# Supplementary material for: Cancer-specific innate and adaptive immune rewiring drives resistance to PD-1 blockade in classic Hodgkin lymphoma
Source: PubMed Central journal article supplement — Nat Commun. 2024 Dec 30;15:10740. doi: 10.1038/s41467-024-54512-7 (PMC11686379; doi:10.1038/s41467-024-54512-7), 2024-12-30
Supplement: 41467_2024_54512_MOESM1_ESM.pdf [file 41467_2024_54512_MOESM1_ESM.pdf]

## Supplementary Information

### **Cancer-specific innate and adaptive immune rewiring drives resistance to PD-1 blockade in classic Hodgkin lymphoma**

Julia Paczkowska<sup>1\*</sup>, Ming Tang<sup>2,7\*</sup>, Kyle T. Wright<sup>3,8\*</sup>, Li Song<sup>2,9</sup>, Kelsey Luu<sup>2,10</sup>, Vignesh Shanmugam<sup>3,4</sup>, Emma L. Welsh<sup>3,5</sup>, Jason L. Weirather<sup>2</sup>, Naomi Besson<sup>3,5</sup>, Harrison Olszewski<sup>3,5</sup>, Billie A. Porter<sup>3,5</sup>, Kathleen L. Pfaff<sup>3,5</sup>, Robert A. Redd<sup>2</sup>, Fathima Zumla Cader<sup>1,11</sup>, Elisa Mandato<sup>1</sup>, Jing Ouyang<sup>1,12</sup>, Eleonora Calabretta<sup>1</sup>, Gali Bai<sup>2,13</sup>, Lee N. Lawton<sup>1</sup>, Philippe Armand<sup>1</sup>, Scott J. Rodig<sup>3,5</sup>, Xiaole Shirley Liu<sup>2,6,14</sup> and Margaret A. Shipp<sup>1#</sup>

<sup>1</sup>Department of Medical Oncology, Dana-Farber Cancer Institute, Boston, MA, USA;

<sup>2</sup>Department of Data Science, Dana-Farber Cancer Institute, Boston, MA, USA;

<sup>3</sup>Department of Pathology, Brigham and Women's Hospital, Boston, MA, USA;

<sup>4</sup>Cancer Program, Broad Institute of MIT and Harvard, Cambridge, MA, USA;

<sup>5</sup>Center for Immuno-Oncology, Dana-Farber Cancer Institute, Boston, MA, USA;

<sup>6</sup>Harvard T.H. Chan School of Public Health, Boston, MA, USA

<sup>7</sup>Present address: Immunitas Therapeutics, Waltham, MA, USA;

<sup>8</sup>Present address: Department of Pathology, University of Oklahoma Health Sciences Center, Oklahoma City, OK, USA;

<sup>9</sup>Present address: Department of Biomedical Data Science, Dartmouth College, Hanover, NH, USA

<sup>10</sup>Present address: PathAI, Boston, MA, USA

<sup>11</sup>Present address: AstraZeneca, City House, Cambridge, UK

<sup>12</sup>Present address: Mechanisms of Cancer Resistance Thematic Center, Bristol Myers Squibb, Cambridge, MA, USA

<sup>13</sup>Present address: Department of Biomolecular Engineering, University of California, Santa Cruz, Santa Cruz, CA, USA

<sup>14</sup>Present address: GV20 Therapeutics, LLC, Cambridge, MA, USA

\*These authors contributed equally

#Corresponding author: Margaret\_Shipp@dfci.harvard.edu

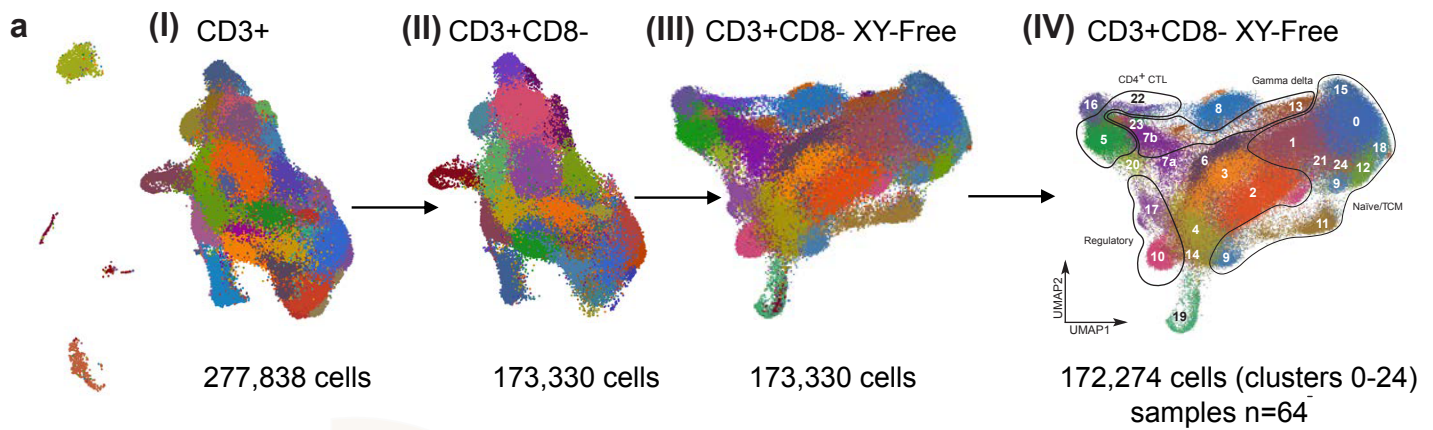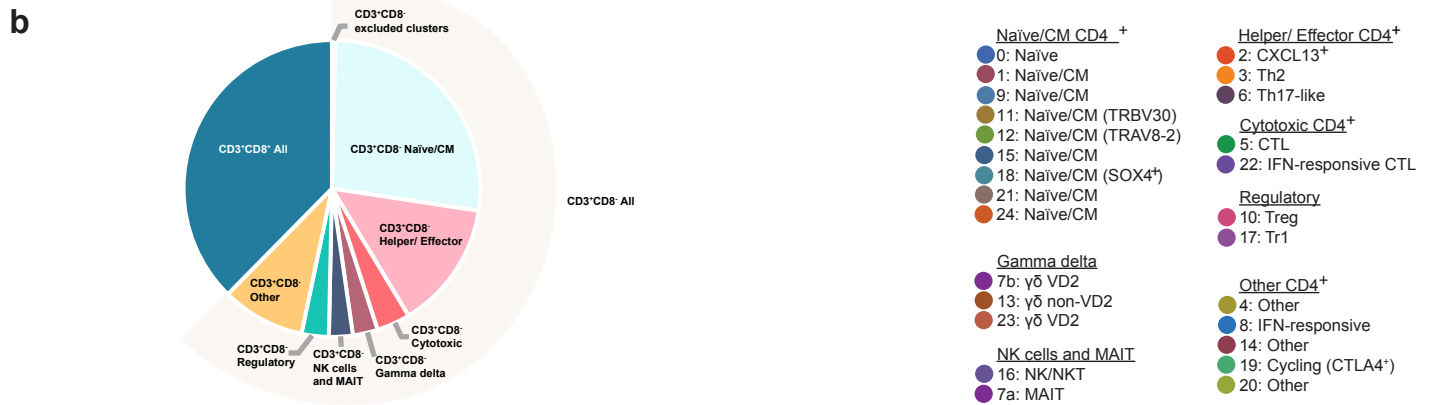

**c** CD3+CD8- XY-Free, split by groups (cluster 0-24)

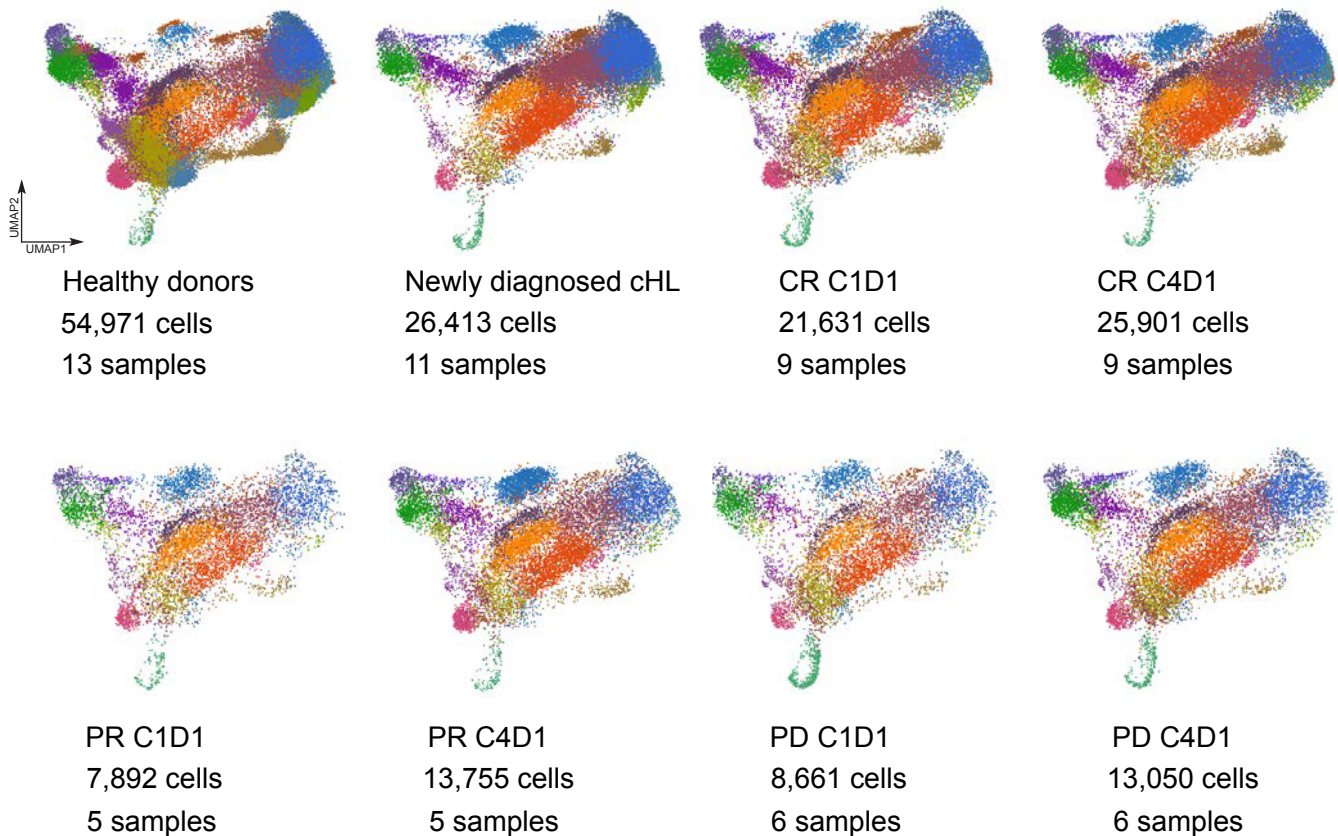

**Supplementary Figure 1. Identification of circulating CD3<sup>+</sup>CD8<sup>-</sup> (CD4<sup>+</sup>-enriched) immune cell populations.** **a** Strategy to obtain the CD3<sup>+</sup>CD8<sup>-</sup> (CD4<sup>+</sup>-enriched) space. (I) Uniform Manifold Approximation and Projection (UMAP) of CD3<sup>+</sup> single-cell expression profiles (n=277,838 individual cells); (II) Computational removal of all CD8A- or CD8B-expressing cells (n=173,330 cells); (III) Reclustering of newly obtained CD3<sup>+</sup>CD8<sup>-</sup> (CD4<sup>+</sup>-enriched) cells, visualized on UMAP; (IV) Exclusion of clusters that did not meet the inclusion criteria (see Methods) and annotation of the remained clusters (n=172,274 cells, clusters 0-24). **b** Composition of all CD3<sup>+</sup> cells. **c** UMAP of CD3<sup>+</sup>CD8<sup>-</sup> (CD4<sup>+</sup>-enriched) single-cell expression profiles (n=172,274 individual cells) split by groups with the indicated number of cells and samples: HD, patients with ND cHL, R/R CR at C1D1, R/R CR at C4D1, R/R PR at C1D1, R/R PR at C4D1, R/R PD at C1D1, R/R PD at C4D1. Source data are provided as a Source Data file.



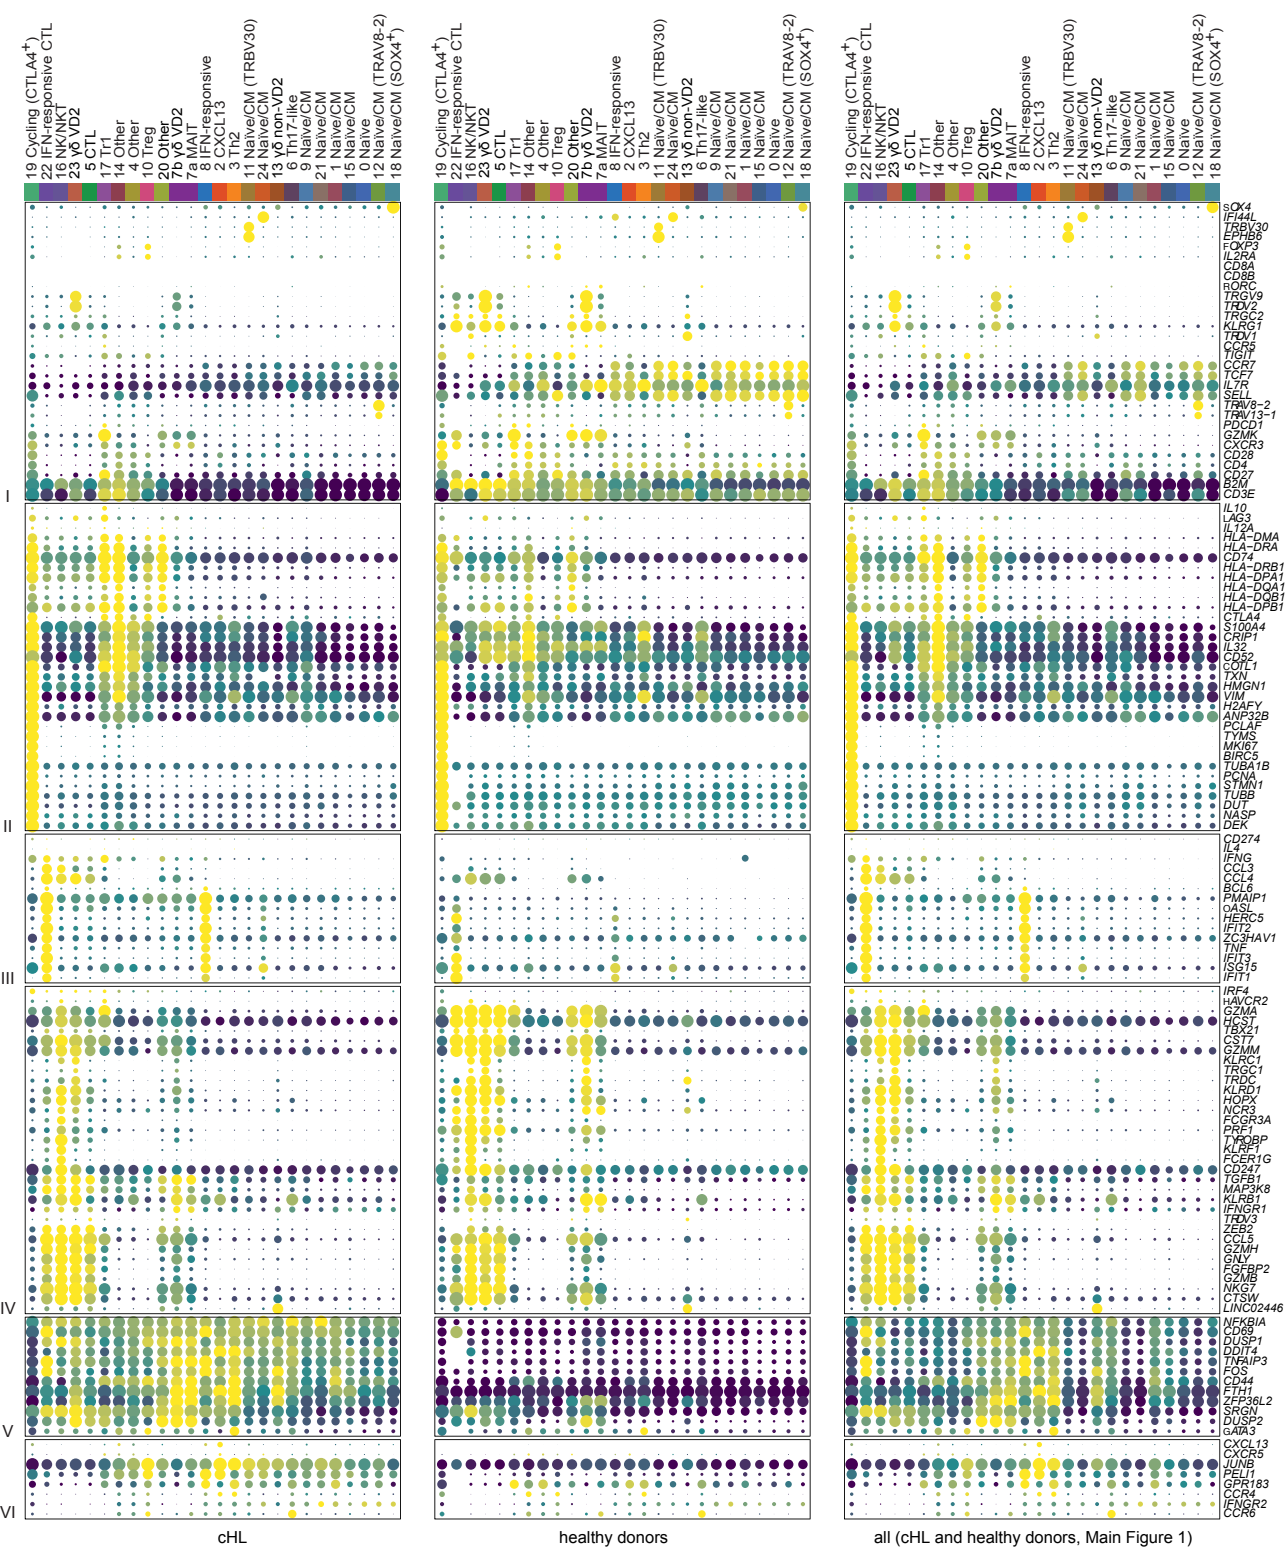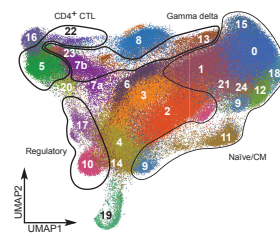

**Supplementary Figure 3. Relative expression of marker genes in circulating CD3<sup>+</sup>CD8<sup>-</sup> (CD4<sup>+</sup>-enriched) immune cell clusters in healthy donors, patients with cHL (newly diagnosed and relapsed/refractory) and the full cohort.** Dot plot with relative expression of selected genes in CD3<sup>+</sup>CD8<sup>-</sup> clusters split by groups: all patients with cHL (newly diagnosed and relapsed/ refractory) (left, n=51 samples), healthy donors (middle, n= 13 samples) and all patients with cHL and healthy donors together (right, n=64 samples). Displayed genes were curated from the top differentially expressed genes that defined clusters using a two-sided Wilcoxon rank sum test, adjusted for multiple comparisons (adj p <0.05, fold change >1.75) and supplemented with relevant markers based on *a priori* knowledge. The size of the dot indicates the percentage of marker-expressing cells in each cluster and the z-score reflects mean marker expression across the clusters.



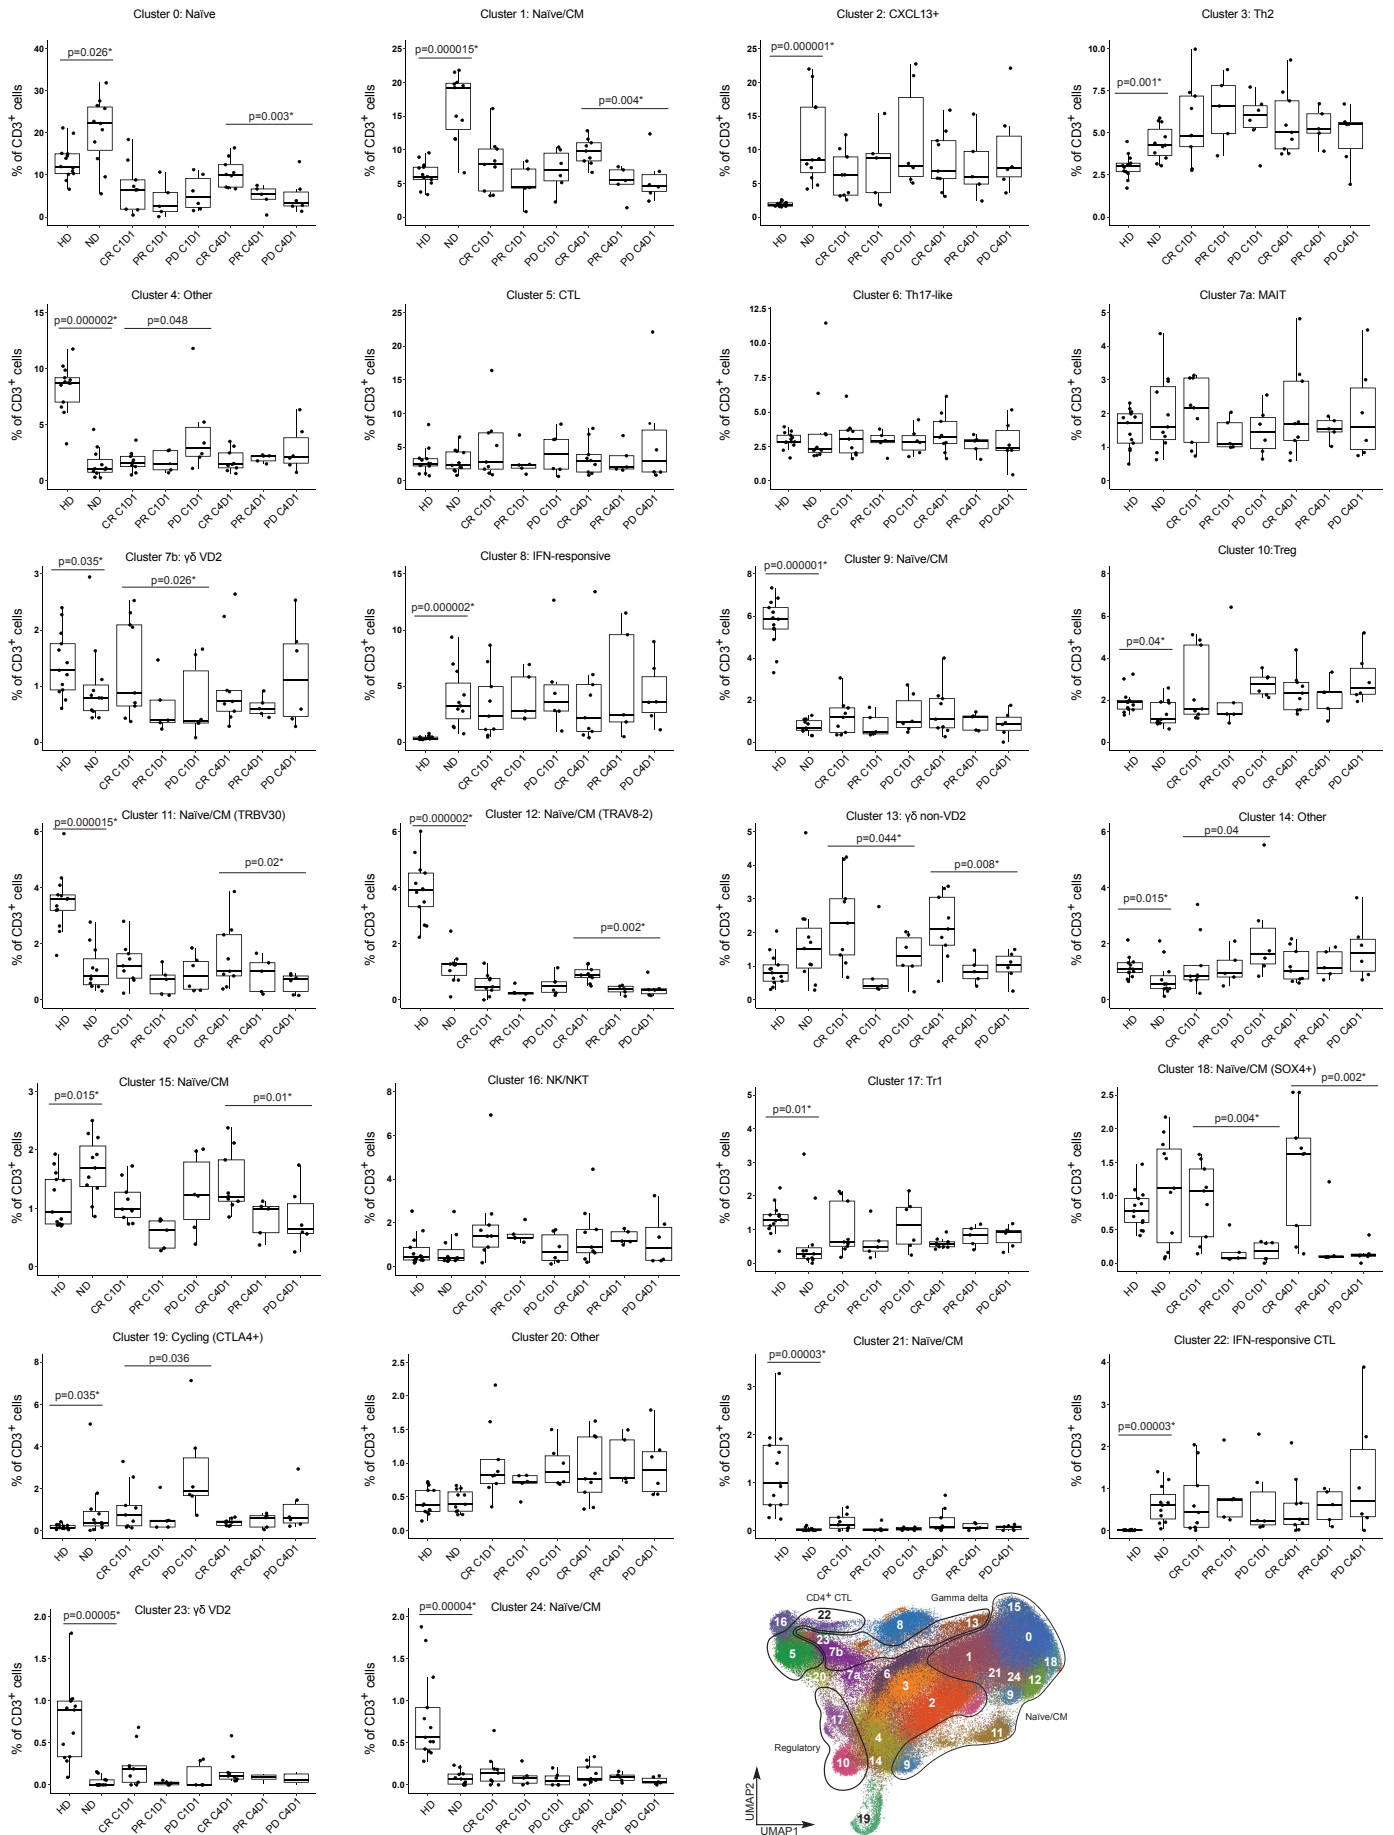

**Supplementary Figure 5. Relative abundance of the circulating CD3<sup>+</sup>CD8<sup>-</sup> (CD4<sup>+</sup>-enriched) clusters from healthy donors (HD, n=13) and patients with newly diagnosed (ND, n=11) cHL and patients with relapsed/refractory (R/R) cHL at baseline [C1D1] (n=20) and C4D1 (n=20) stratified by the best overall response (BOR) to PD-1 blockade. CR=Complete response (n=9), PR=partial response (n=5), PD=progressive disease (n=6). Differences between HD and patients with ND cHL were assessed by a two-sided Wilcoxon rank-sum test. A one-sided Cuzick trend test was used to compare patients with R/R cHL by BOR (CRs, PRs, and PDs). The indicated nominal p values were adjusted for multiple comparisons using the Benjamini-Hochberg methods; p values that remained significant after Benjamini-Hochberg correction FDR<0.1 are noted (\*). UMAP at the bottom for reference. All box plots generated in R display the 25th and 75th percentiles (lower and upper hinges), median values, and whiskers. The whiskers extend from the hinges to the largest/smallest values within 1.5 times the interquartile range (IQR) from the hinge. Data points beyond the end of the whiskers are plotted individually. Source data are provided as a Source Data file.**

**a**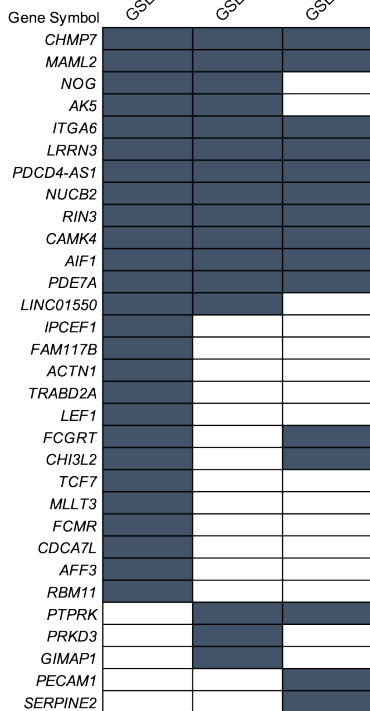**b**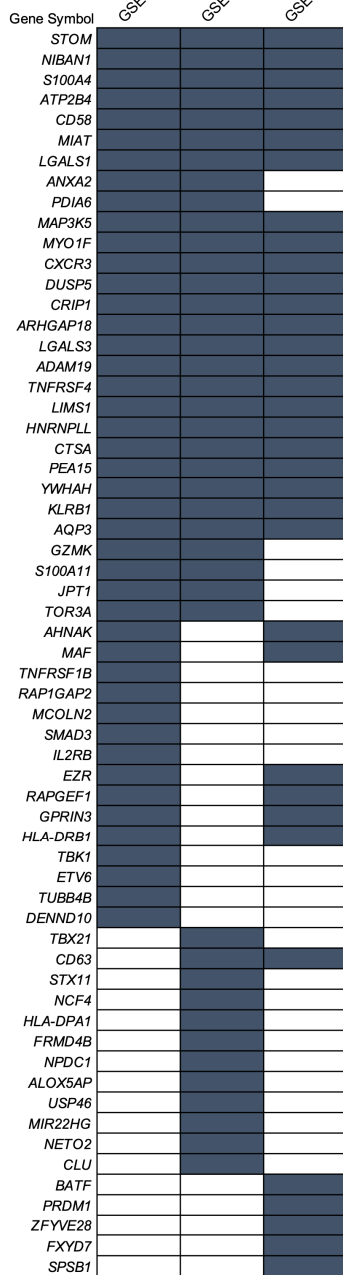**c**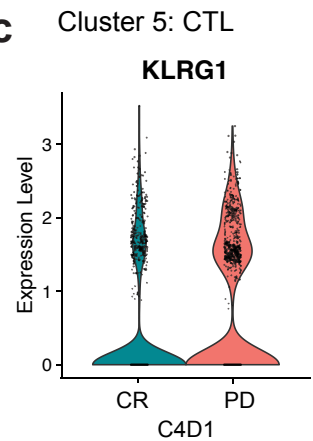

**Supplementary Figure 6. Differential expression of response-related genes in CD4<sup>+</sup> T cells.** **a-b** Pathway enrichment analyses of response-related differentially expressed genes in the naïve/central memory (CM) CD4 T-cell clusters (0, 1, 9, 11, 12, 15, 18, 21 and 24) using Molecular Signatures Database (MSigDB) and C7: Immunologic gene sets. Results are based on a differential analysis of naïve/CM CD4 T-cell transcripts in patients who achieved a CR or progressed (PD) on PD-1 blockade at C4D1. A two-sided permutation test, adjusted for multiple comparisons (adj p < 0.1, fold change > 1.5) was used to filter the differentially expressed genes in patients who achieved a CR or PD. **a** Transcripts that are more abundant in CRs than in PDs. **b** Transcripts that are less abundant in CRs than in PDs. **c** Violin plots showing the relative expression of *KLRG1* in Cluster 5: CTL in CRs versus PDs. The plot generated in R illustrates the data distribution with kernel density estimation. Plot displays the 25th and 75th percentiles (lower and upper hinges) and median values. The width of the violin at different points reflects the density of the data. Source data are provided as a Source Data file.

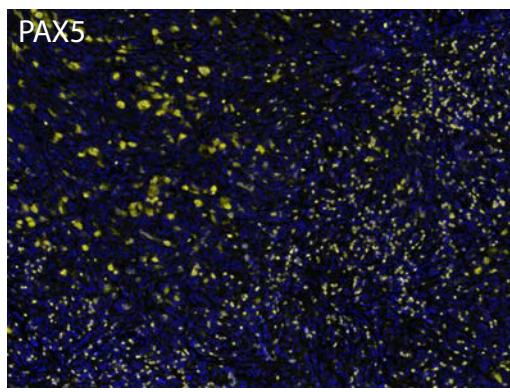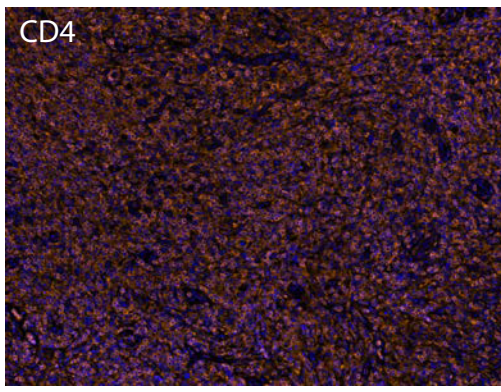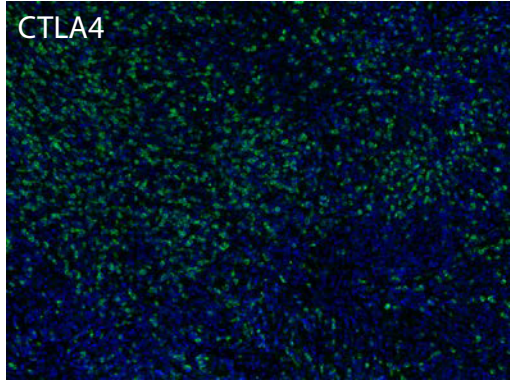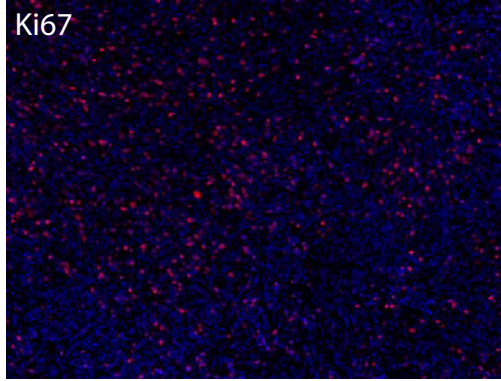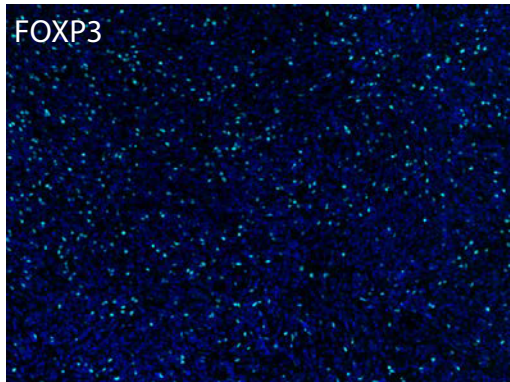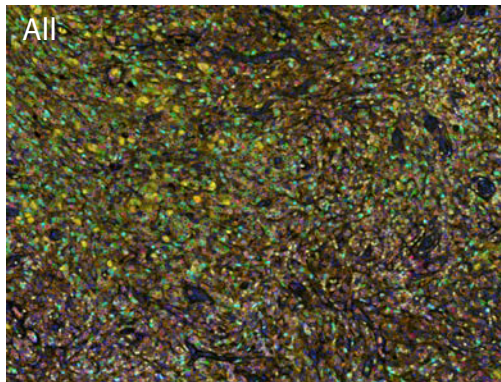

**Supplementary Figure 7. Multiplex immunofluorescence imaging of CD4<sup>+</sup>CTLA4<sup>+</sup> cycling cells in the intact cHL tumor immune microenvironment.** Single marker images of PAX5, CD4, CTLA4, Ki67 and FOXP3 staining by multiplex immunofluorescence of a representative newly diagnosed (ND) cHL. This experiment was performed in 9 ND cHL samples.



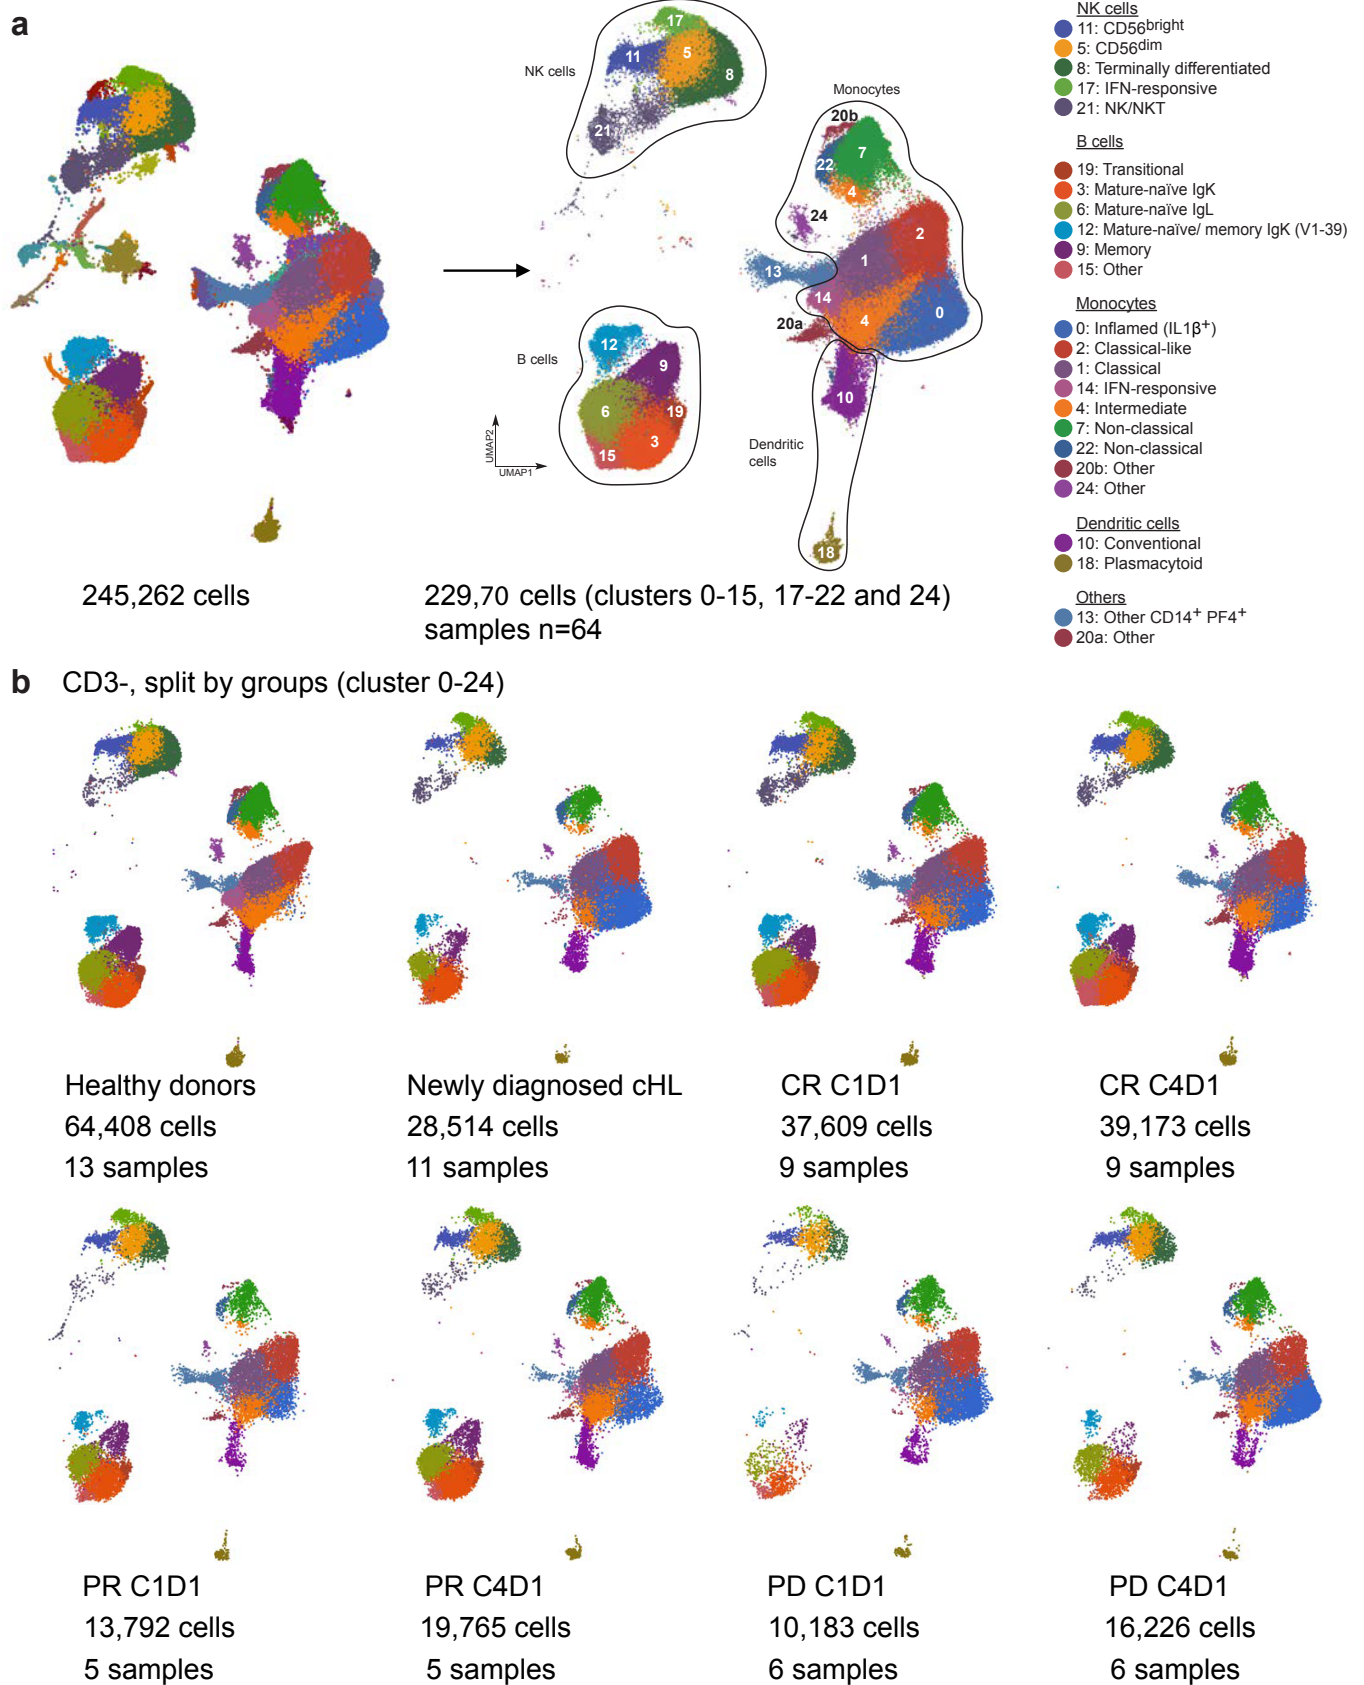

**Supplementary Figure 8. Identification of circulating CD3<sup>-</sup> immune cell populations.** **a** Uniform Manifold Approximation and Projection (UMAP) of CD3<sup>-</sup> single-cell expression profiles (n=245,262 individual cells) (left); Exclusion of clusters that did not meet the inclusion criteria and annotation of the remaining clusters (n=229,669 cells, clusters 0-15, 17-22 and 24) (right). **b** UMAP of CD3<sup>-</sup> single-cell expression profiles split by groups with the indicated number of cells and samples: HD, patients with ND cHL, R/R CR at C1D1, R/R CR at C4D1, R/R PR at C1D1, R/R PR at C4D1, R/R PD at C1D1, R/R PD at C4D1.



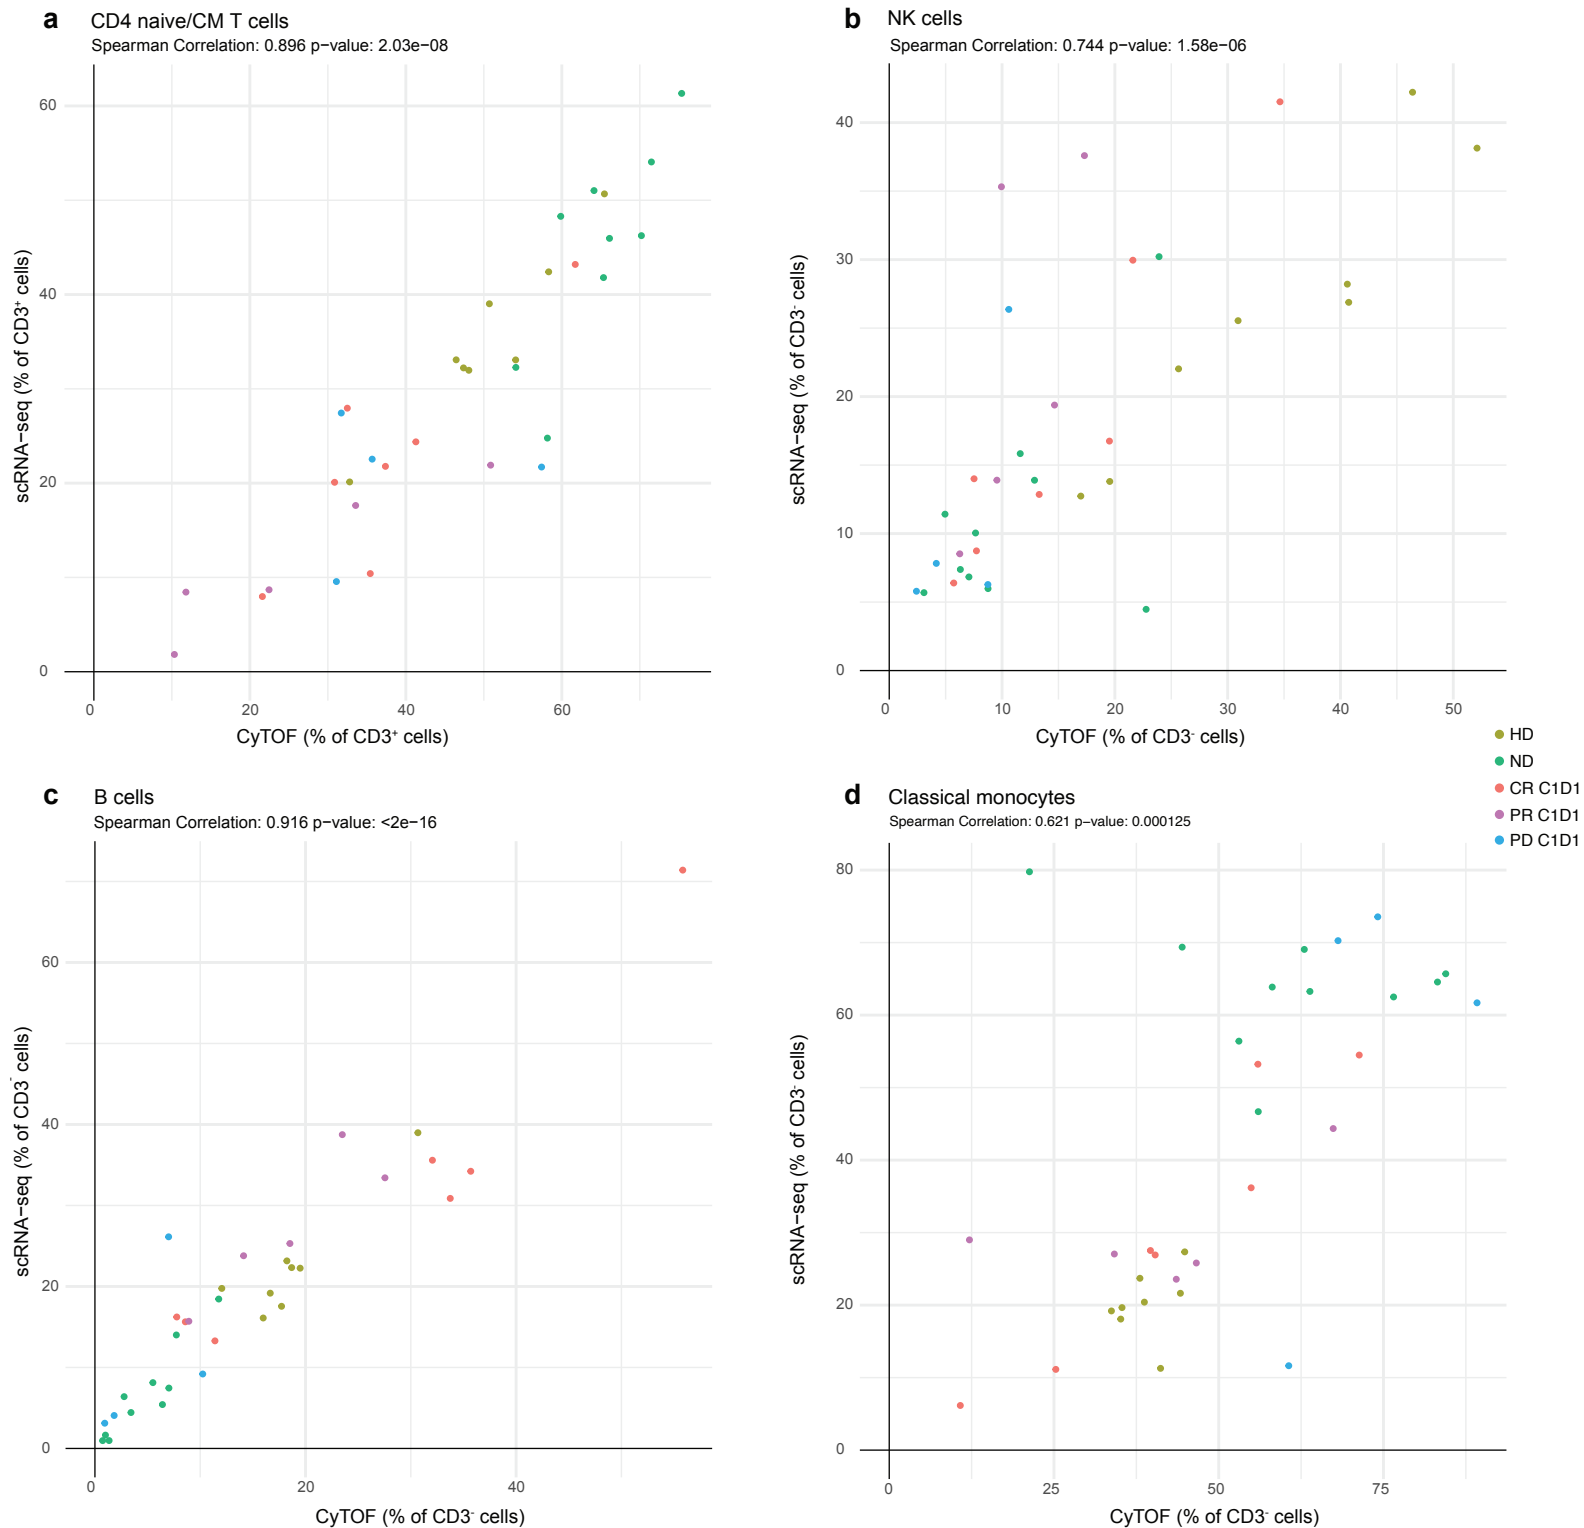

**Supplementary Figure 10. Correlation between the abundance of (a) CD4 naive/CM T cells, (b) NK cells, (c) B cells, and (d) classical monocytes in serial peripheral blood aliquots from healthy donors (HD) and patients with cHL determined by CyTOF (reported in Cader et al Nat. Med. 26:1468-1479 [2020]) and scRNA-seq (this study).** Protein-based CyTOF data and scRNA-seq analyses on serial aliquots of the same C1D1 peripheral blood mononuclear cell samples from 8 of 13 HD, 10 of 11 patients with newly diagnosed (ND) cHL, and 7 of 9 complete responders (CR), 5 of 5 partial responders (PR) and 4 of 6 patients with progressive disease (PD) are compared. Correlations between the abundance of these cell types as determined by flow cytometry (CyTOF) and scRNA seq were assessed using Spearman correlations. Source data are provided as a Source Data file.

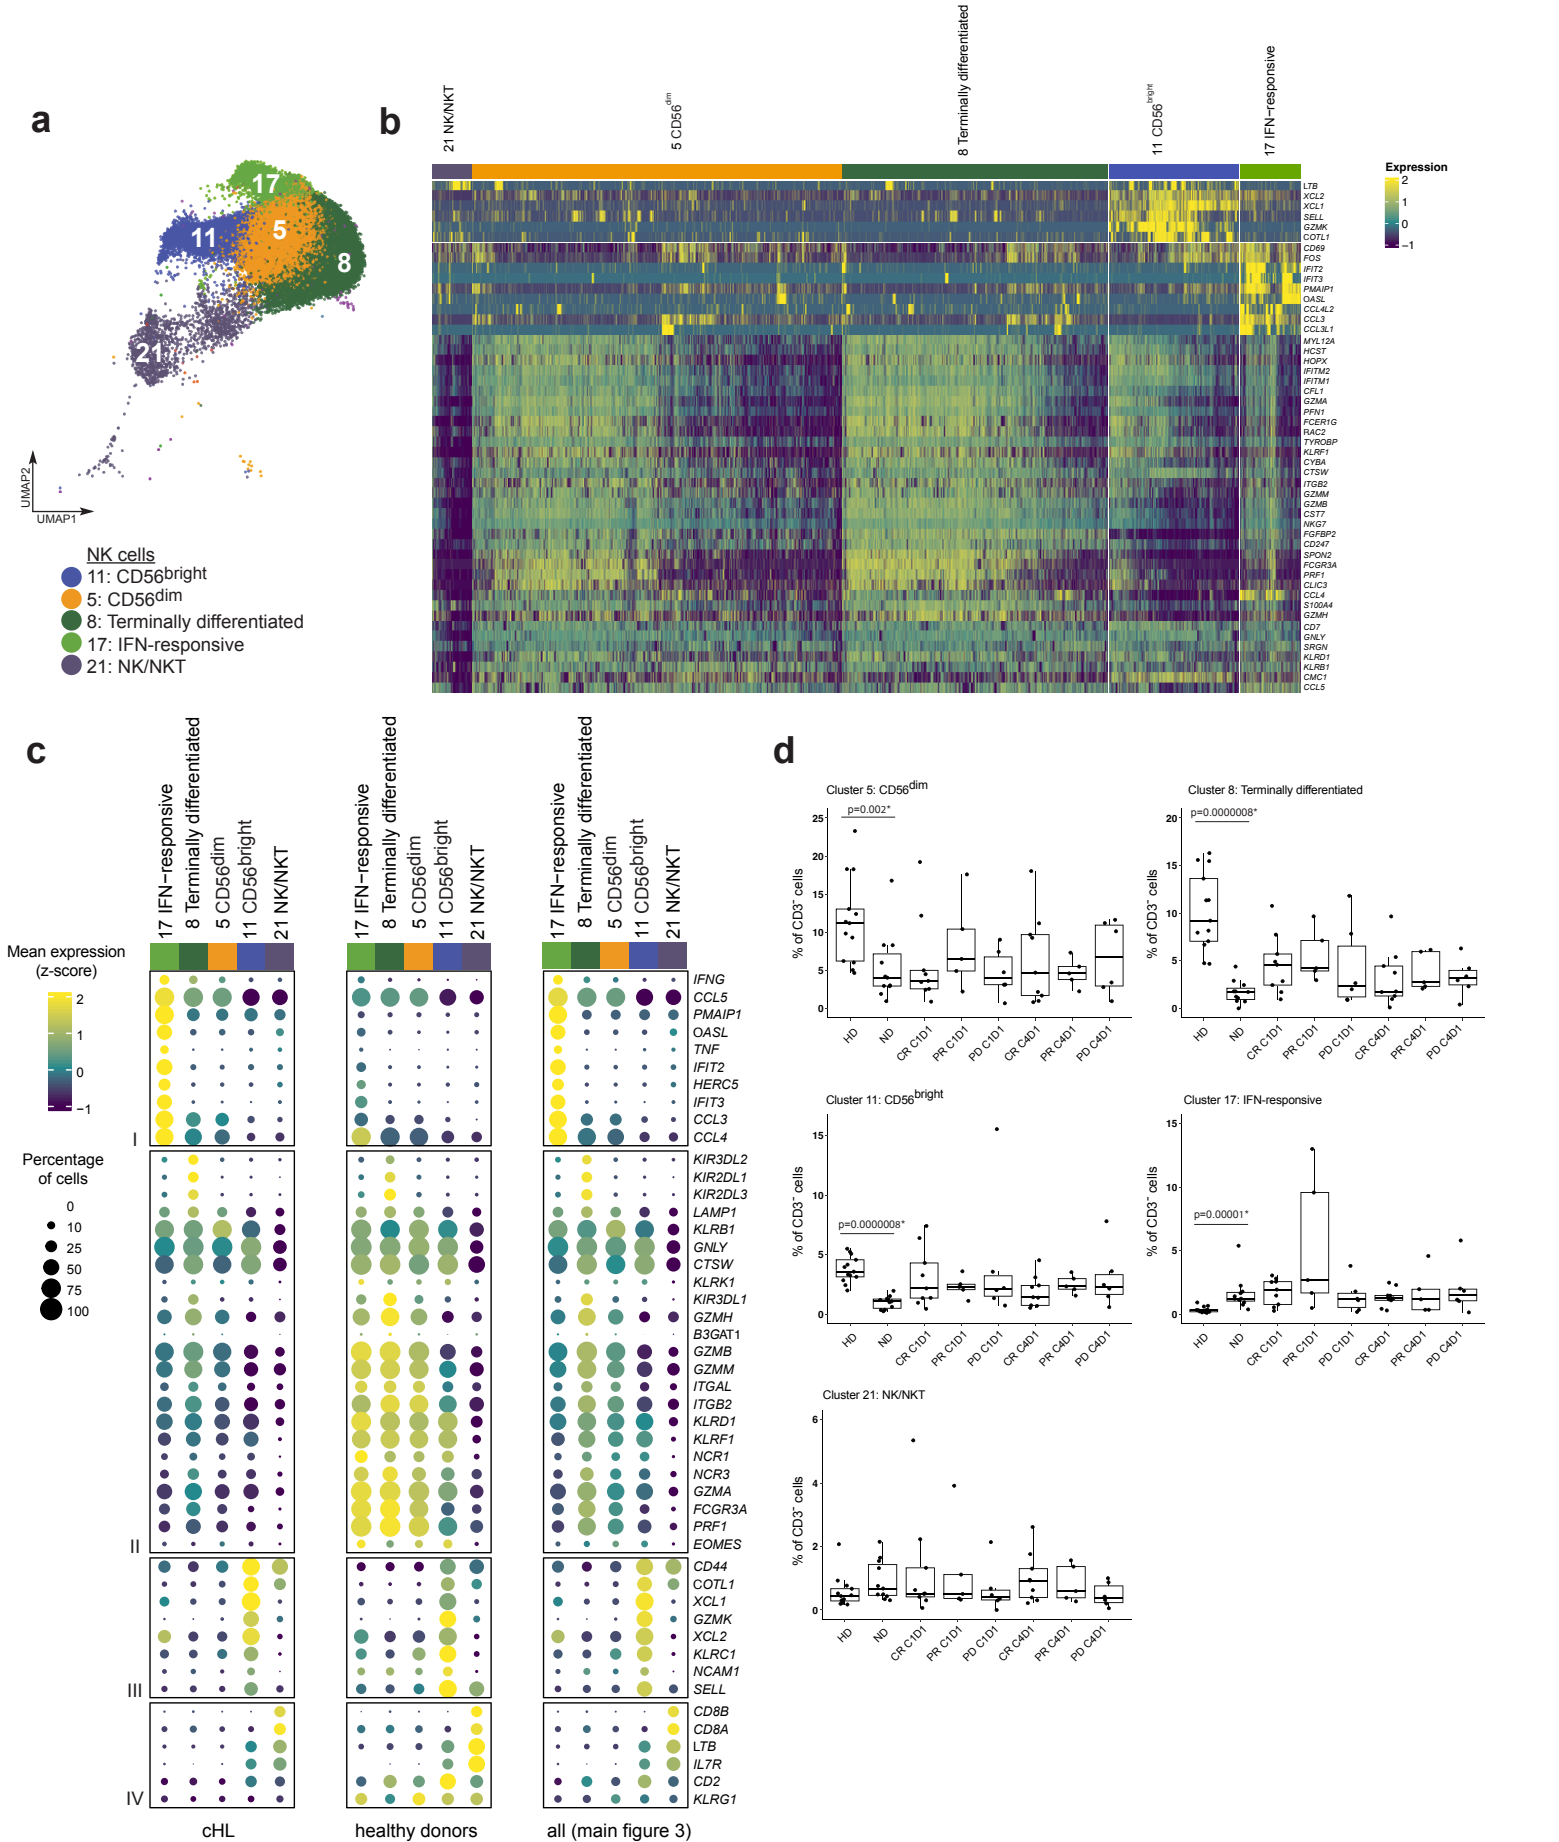

**Supplementary Figure 11. Circulating NK-cell populations.** **a** Annotated Uniform Manifold Approximation and Projection (UMAP) of NK-cell clusters (n=40,844 cells). **b** Heatmap showing the relative expression (z-score normalized per gene) of the top differentially expressed genes that defined NK-cell clusters (a two-sided Wilcoxon rank sum test, adjusted for multiple comparisons, adj p <0.05, fold change >1.75). **c** Dot plot with relative expression of selected genes in NK-cell clusters split by groups: all patients with cHL (left, n=51 samples), healthy donors (middle, n= 13 samples) and patients with cHL and healthy donors together (right, n=64 samples). Displayed genes were curated from the top differentially expressed genes that defined clusters using a two-sided Wilcoxon rank sum test, adjusted for multiple comparisons (adj p <0.05, fold change >1.75) and supplemented with relevant markers based on *a priori* knowledge. The size of the dot indicates the percentage of marker-expressing cells in each cluster and the z-score reflects mean marker expression across the clusters. **d** Relative abundance of NK-cell clusters in HD (n=13), patients with newly diagnosed (ND) cHL (n=11) and patients with relapsed/refractory R/R cHL at baseline [C1D1] (n=20) and on treatment [C4D1] (n=20) stratified by BOR to PD-1 blockade. Differences between HD and patients with ND cHL were assessed by a two-sided Wilcoxon rank-sum test. A one-sided Cuzick trend test was used to compare patients with R/R cHL by BOR (CRs, PRs, and PDs). The indicated nominal p values were adjusted for multiple comparisons using the Benjamini-Hochberg methods; p values that remained significant after Benjamini-Hochberg correction FDR<0.1 are noted (\*). All box plots generated in R display the 25th and 75th percentiles (lower and upper hinges), median values, and whiskers. The whiskers extend from the hinges to the largest/smallest values within 1.5 times the interquartile range (IQR) from the hinge. Data points beyond the end of the whiskers are plotted individually. Source data are provided as a Source Data file.

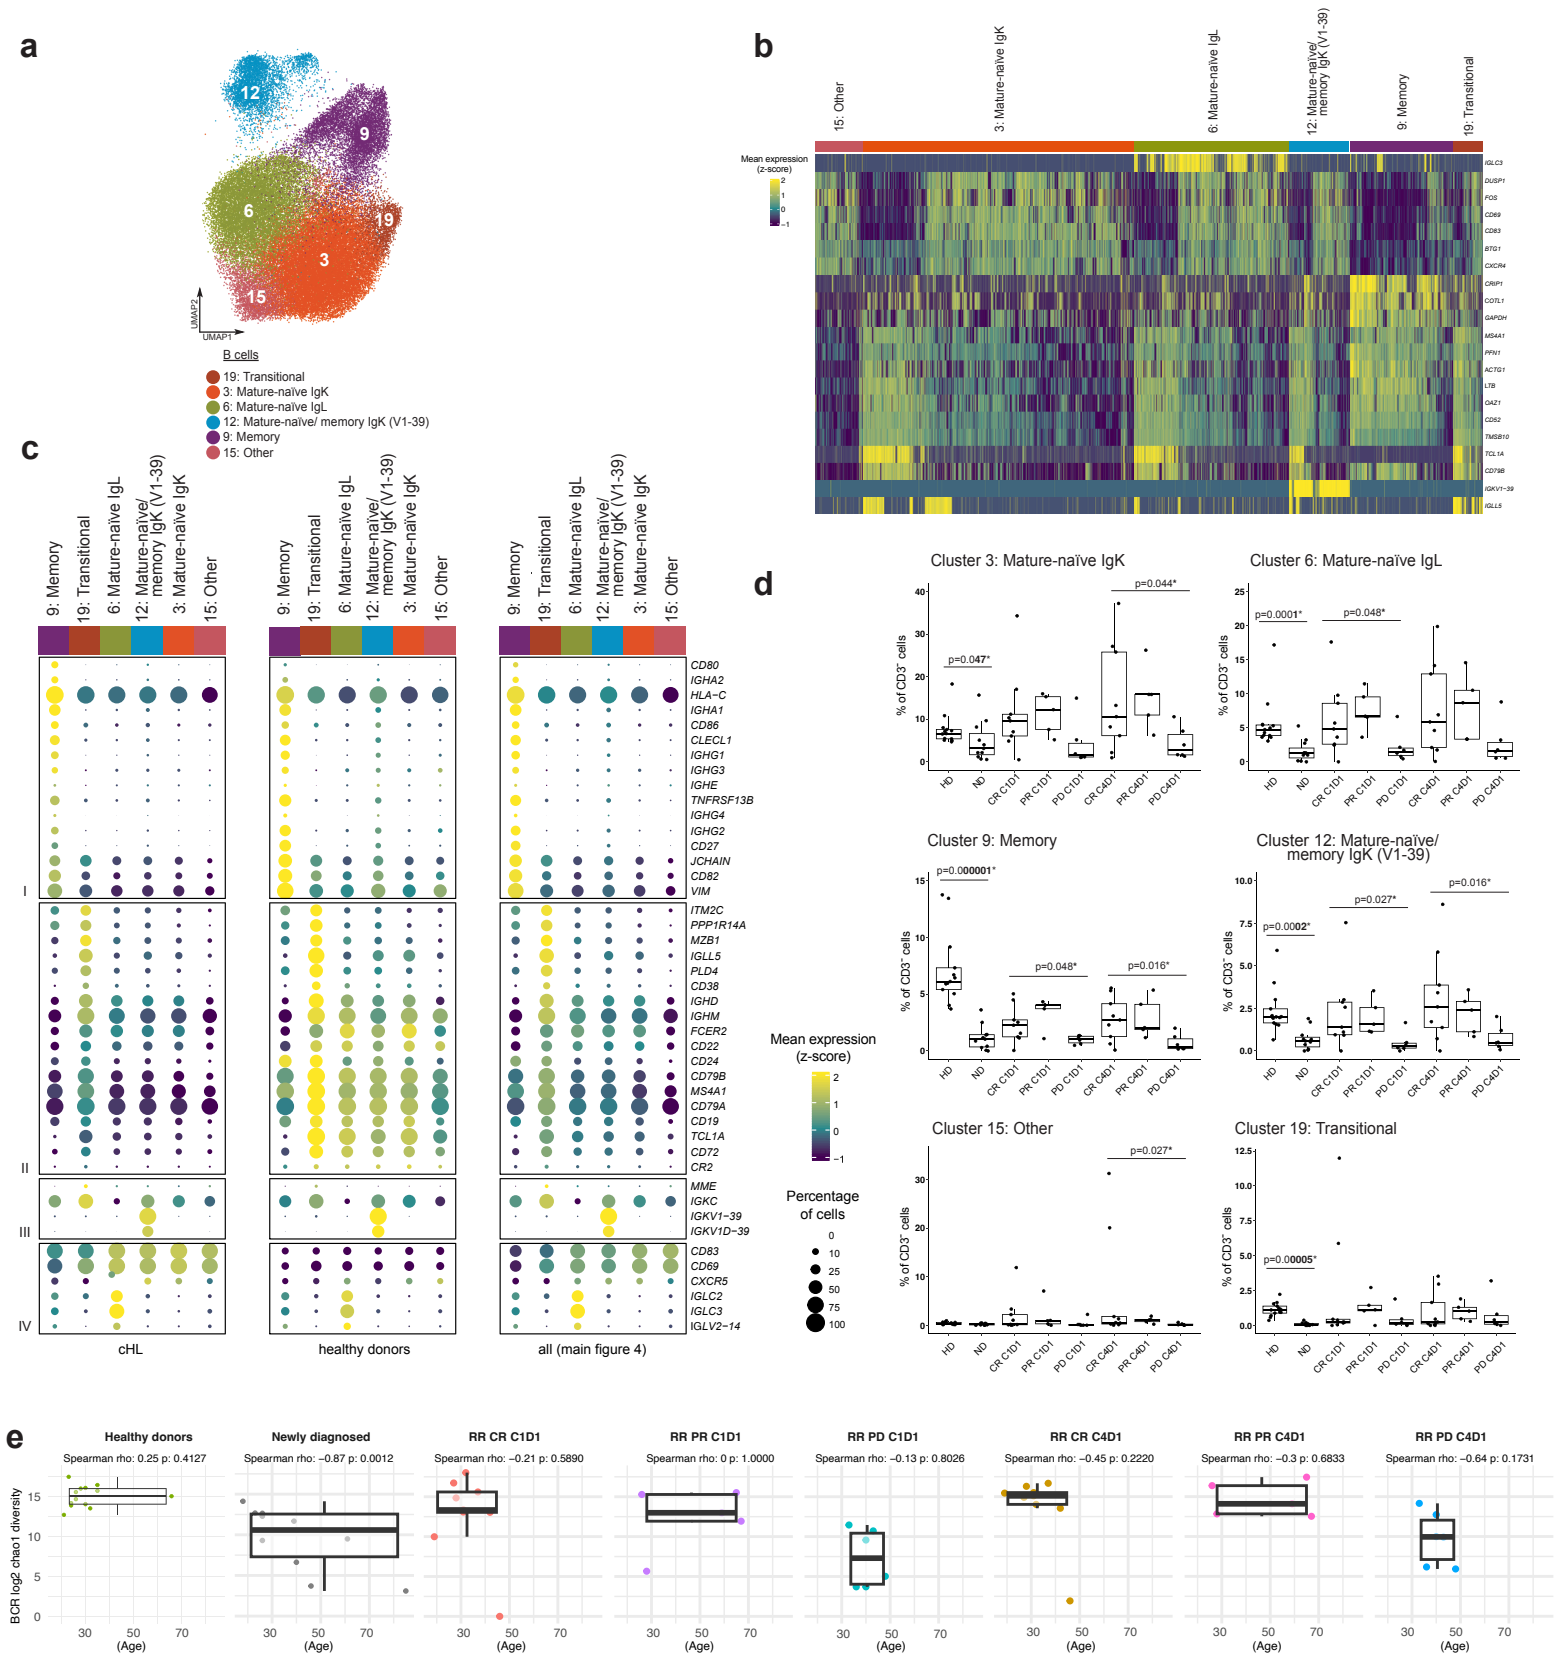

**Supplementary Figure 12. Circulating B-cell populations.** **a** Annotated Uniform Manifold Approximation and Projection (UMAP) of B-cell clusters ( $n=55,598$  cells). **b** Heatmap showing the relative expression (z-score normalized per gene) of the top differentially expressed genes that defined B-cell clusters (adj  $p < 0.05$ , FC  $> 1.75$ ). **c** Dot plot with relative expression of selected genes in B-cell clusters split by groups: all patients with cHL (left,  $n=51$  samples), healthy donors (middle,  $n=13$  samples) and patients with cHL and healthy donors together (right,  $n=64$  samples). Displayed genes were curated from the top differentially expressed genes that defined clusters using a two-sided Wilcoxon rank sum test, adjusted for multiple comparisons (adj  $p < 0.05$ , fold change  $> 1.75$ ) and supplemented with relevant markers based on *a priori* knowledge. The size of the dot indicates the percentage of marker-expressing cells in each cluster and the z-score reflects mean marker expression across the clusters. **d** Relative abundance of B-cell clusters in HD ( $n=13$ ), patients with newly diagnosed (ND) cHL ( $n=11$ ) and patients with relapsed/refractory R/R cHL at baseline [C1D1] ( $n=20$ ) and on treatment [C4D1] ( $n=20$ ) stratified by BOR to PD-1 blockade. Differences between HD and patients with ND cHL were assessed by a two-sided Wilcoxon rank-sum test. A one-sided Cuzick trend test was used to compare patients with R/R cHL by BOR (CRs, PRs, and PDs). The indicated nominal p values were adjusted for multiple comparisons using the Benjamini-Hochberg methods; p values that remained significant after Benjamini-Hochberg correction  $FDR < 0.1$  are noted (\*). All box plots generated in R display the 25th and 75th percentiles (lower and upper hinges), median values, and whiskers. The whiskers extend from the hinges to the largest/smallest values within 1.5 times the interquartile range (IQR) from the hinge. Data points beyond the end of the whiskers are plotted individually. **e** Correlation between patients' age (x-axis) and BCR log<sub>2</sub> chao1 diversity of all B cells (y-axis) (Spearman correlation). Source data are provided as a Source Data file.

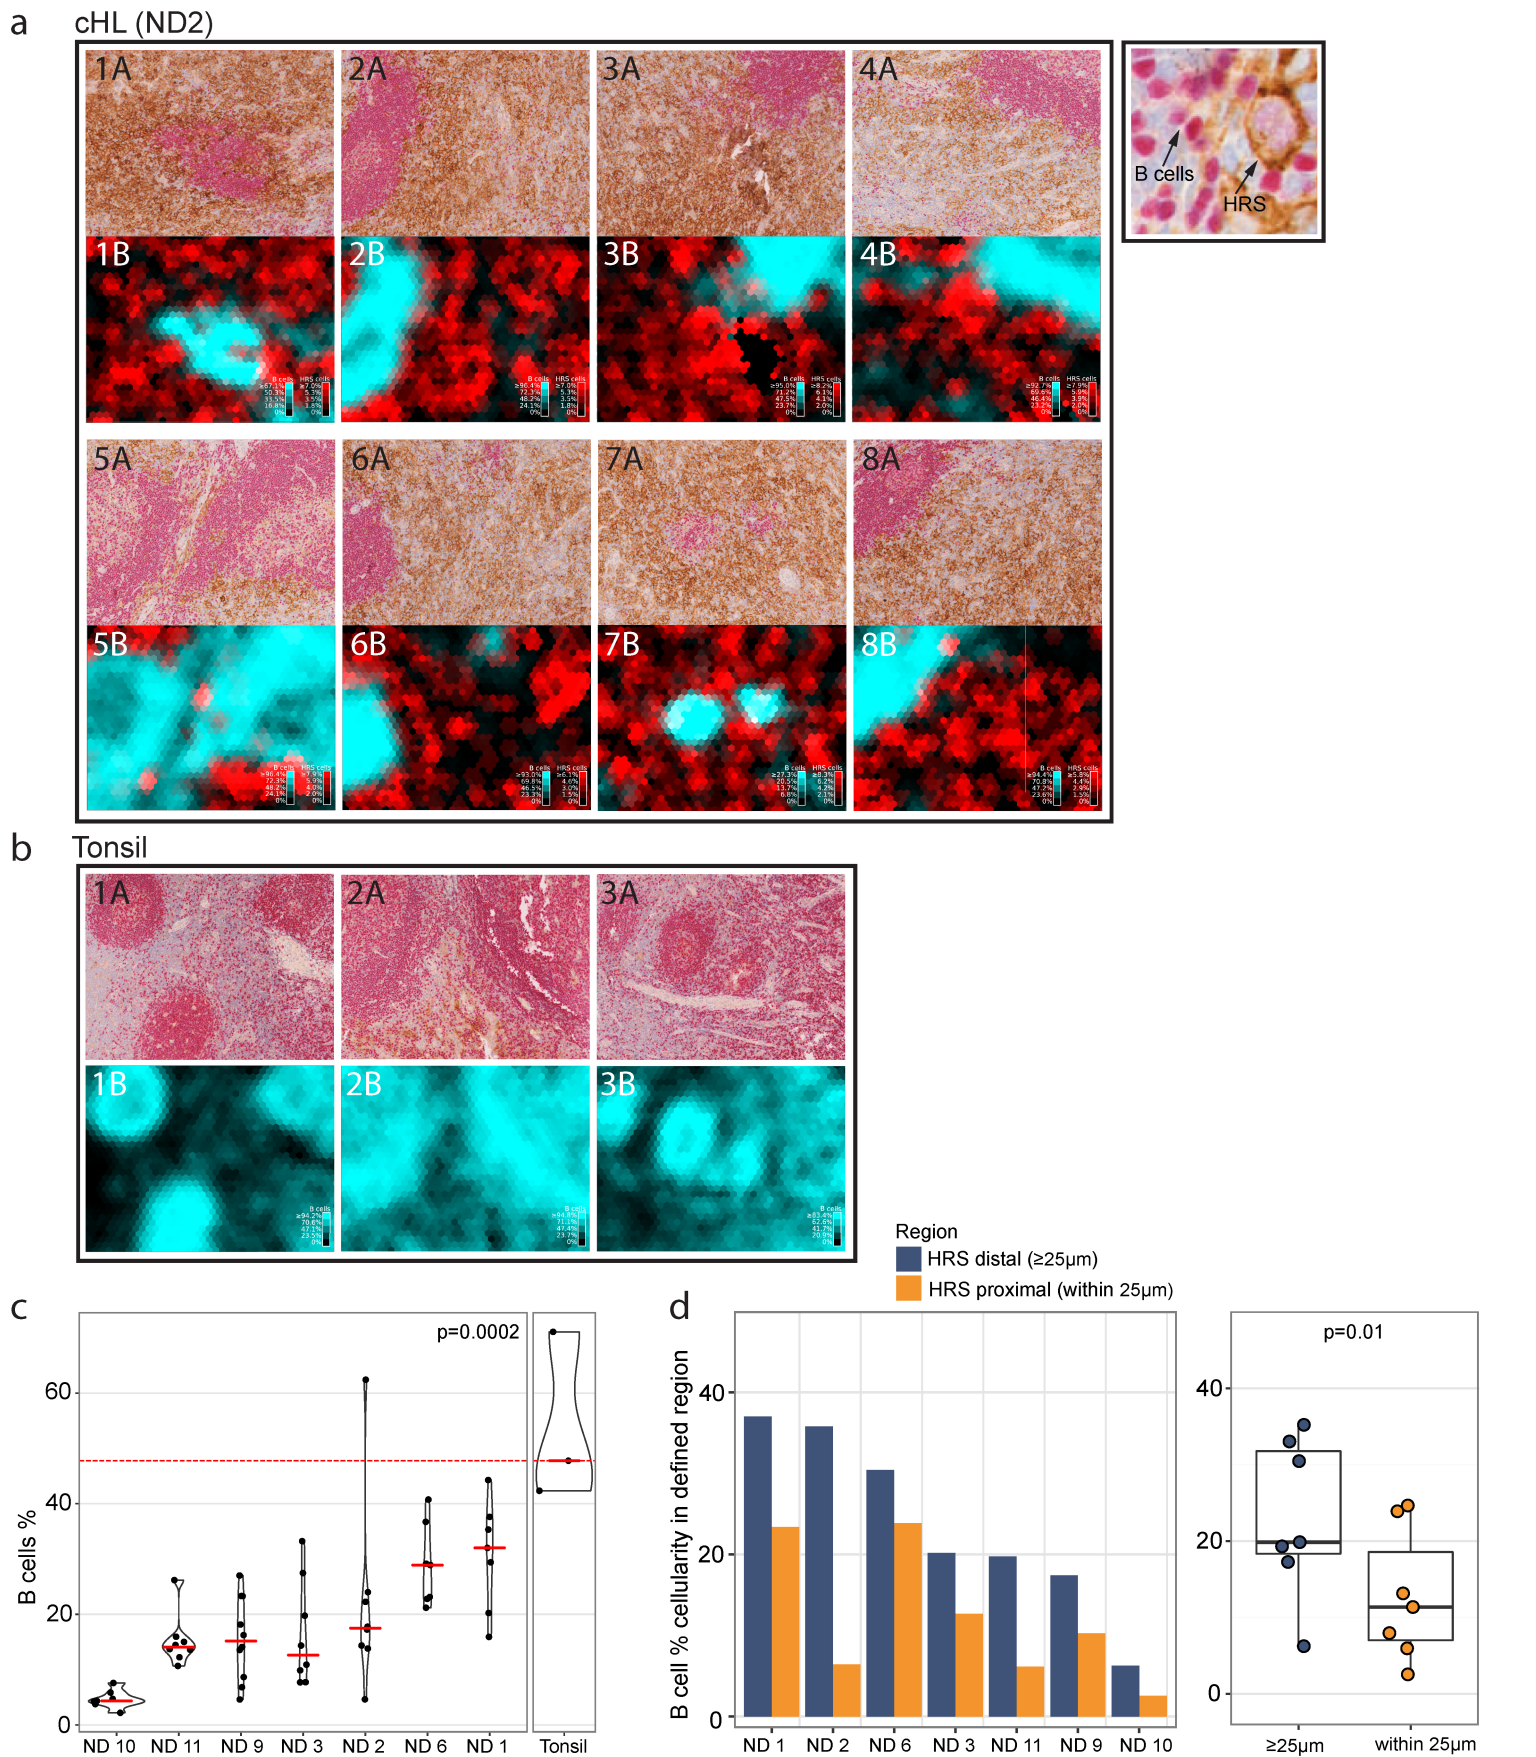

**Supplementary Figure 13. Immunohistochemical analyses of normal infiltrating B cells in the intact cHL tumor immune microenvironment.** **a** (Left, top panels, 1A-8A) Eight selected regions of interest (ROIs) of double PAX5 (red) and PD-L1 (brown) IHC images (17x magnification) from a representative newly diagnosed cHL (ND2). (Right upper panel). High magnification (57x) image of a larger PAX5<sup>dim</sup> PD-L1<sup>+</sup> HRS cell and additional smaller PAX5<sup>bright</sup> normal B cells. (Left, bottom panels, 1B-8B) Composite heatmaps for PAX5<sup>dim</sup> PD-L1<sup>+</sup> HRS cells (red – high density of HRS cells) and PAX5<sup>bright</sup> B cells (cyan – high density of B cells) overlaid on the original IHC images (from 1A-8A). The color intensities for each heatmap were determined by calculating the percentage of cells with the given phenotype (HRS: PAX5<sup>dim</sup> PD-L1<sup>+</sup>, B cells: PAX5<sup>bright</sup>) among all cells within a 37 $\mu\text{m}$  radius distance of each hexagon's centroid. Each hexagon has a horizontal width (short diagonal) of 25  $\mu\text{m}$ . The color scale for each ROI is shown in the lower right corner. This experiment was performed in 7 ND cHL samples **b** (Top panels, 1A-3A) Selected ROIs of double PAX5 (red) and PD-L1 (brown) IHC images (17x magnification) from a control tonsil. (Bottom panels, 1B-3B) Heatmaps for normal B cells (cyan – high density of PAX5<sup>bright</sup> B cells) overlaid on the original IHC images (from 1A-3A). **c** Fraction of PAX5<sup>bright</sup> B cells in the intact microenvironment of 7 newly diagnosed cHLs and a control tonsil. Each dot is a separately evaluated ROI. P value (0.0002, two-sided T-test) reflects the difference between the median normal B-cell percentage in the control tonsil and the 7 evaluated newly diagnosed cHLs. **d** B-cell cellularity in defined regions represented as % of normal B cells among all cells proximal to HRS cells (within 25 $\mu\text{m}$ , orange) or distal to HRS cells (>25 $\mu\text{m}$ , blue), paired for each individual case (left panel) and summarized for all cases together (right panel) (two-sided T-test). Source data are provided as a Source Data file.



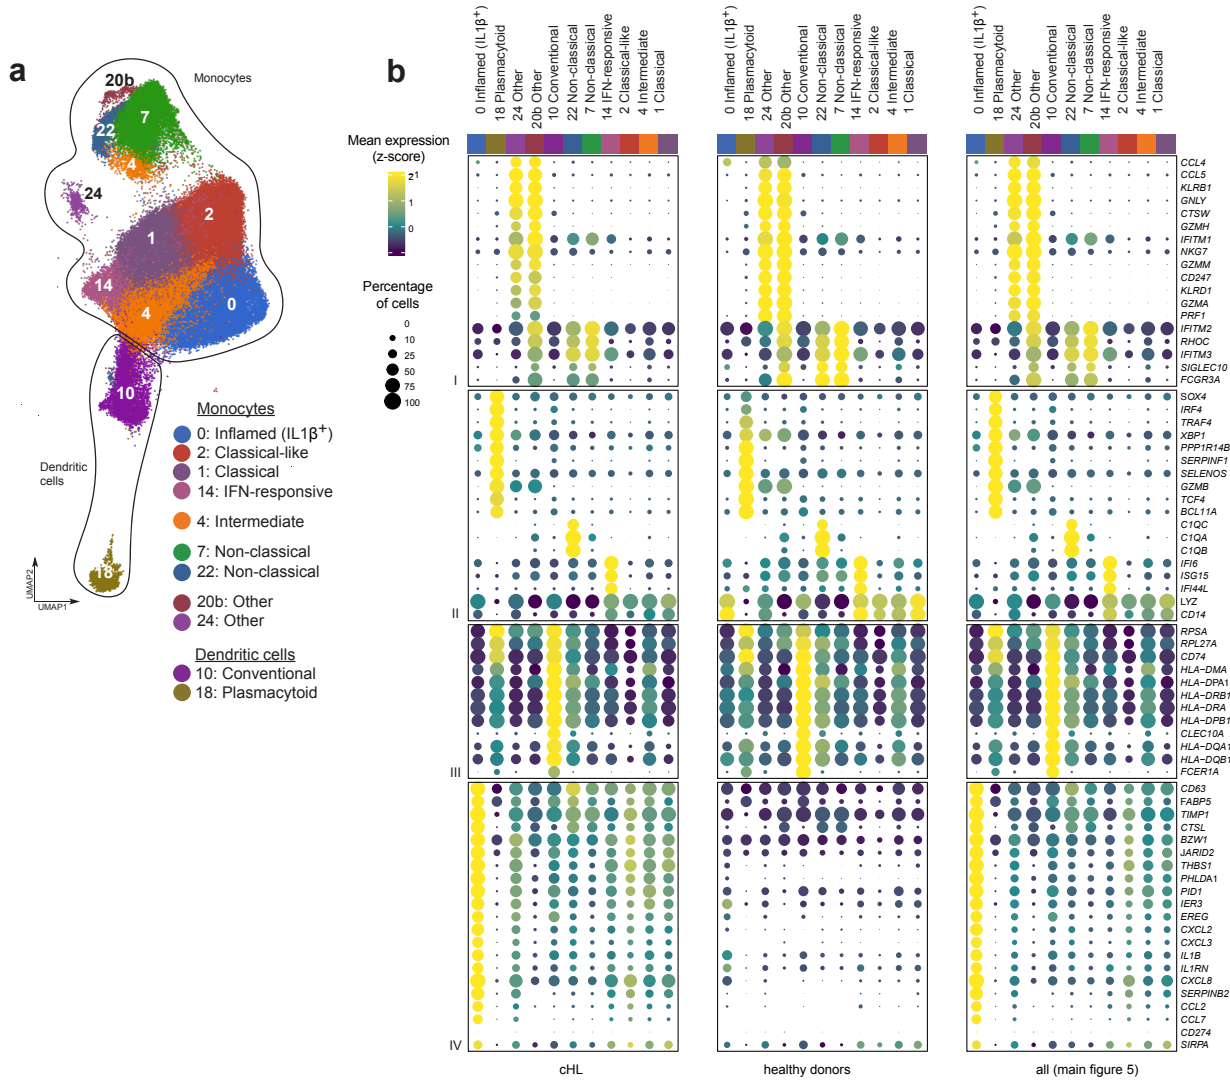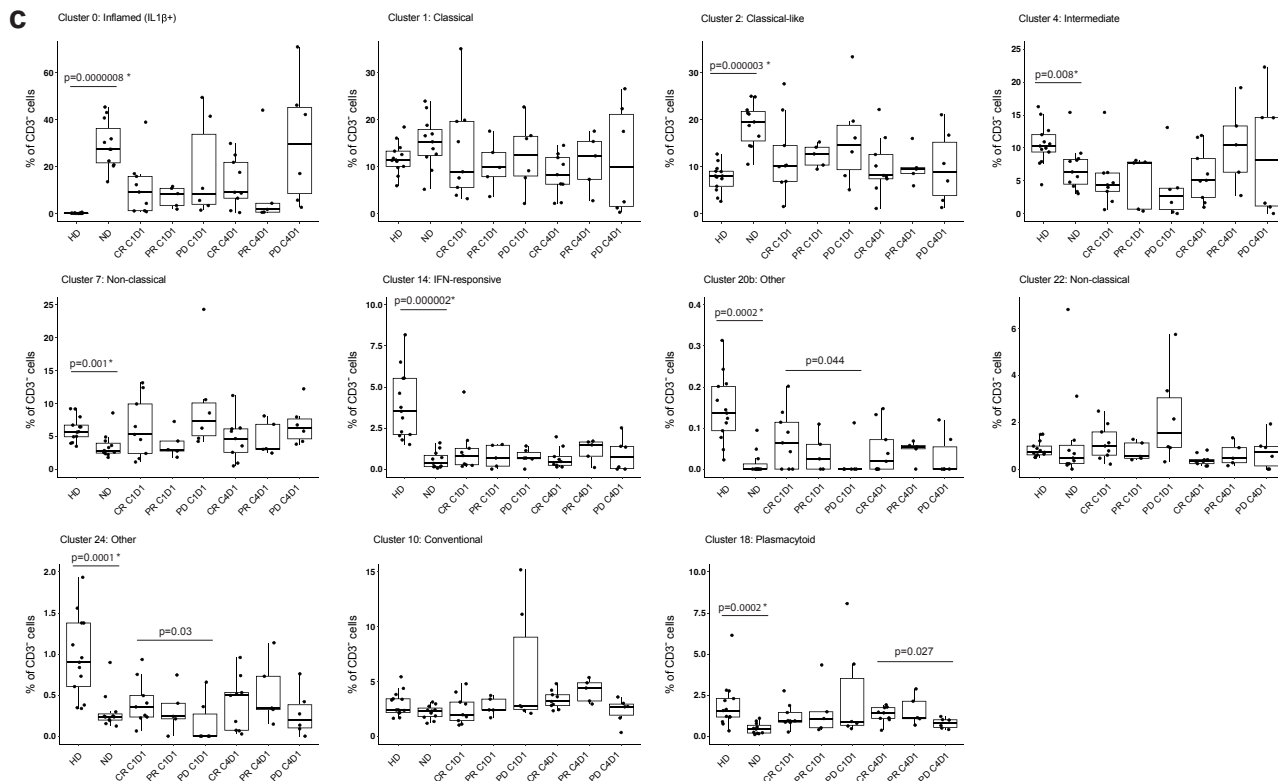

**Supplementary Figure 15. Circulating myeloid populations.** **a** Annotated Uniform Manifold Approximation and Projection (UMAP) of myeloid clusters ( $n=126,707$  cells). **b** Dot plot with relative expression of selected genes in myeloid clusters split by groups: all patients with cHL (left,  $n=51$  samples), healthy donors (middle,  $n=13$  samples) and patients with cHL and healthy donors together (right,  $n=64$  samples). Displayed genes were curated from the top differentially expressed genes that defined clusters using a two-sided Wilcoxon rank sum test, adjusted for multiple comparisons ( $\text{adj } p < 0.05$ , fold change  $> 1.75$ ) and supplemented with relevant markers based on *a priori* knowledge. The size of the dot indicates the percentage of marker-expressing cells in each cluster and the z-score reflects mean marker expression across the clusters. **c** Relative abundance of myeloid clusters in HD ( $n=13$ ), patients with newly diagnosed (ND) cHL ( $n=11$ ) and patients with relapsed/refractory R/R cHL at baseline [C1D1] ( $n=20$ ) and on treatment [C4D1] ( $n=20$ ) stratified by BOR to PD-1 blockade. Differences between HD and patients with ND cHL were assessed by a two-sided Wilcoxon rank-sum test. A one-sided Cuzick trend test was used to compare patients with R/R cHL by BOR (CRs, PRs, and PDs). The indicated nominal p values were adjusted for multiple comparisons using the Benjamini-Hochberg methods; p values that remained significant after Benjamini-Hochberg correction  $\text{FDR} < 0.1$  are noted (\*). All box plots generated in R display the 25th and 75th percentiles (lower and upper hinges), median values, and whiskers. The whiskers extend from the hinges to the largest/smallest values within 1.5 times the interquartile range (IQR) from the hinge. Data points beyond the end of the whiskers are plotted individually. Source data are provided as a Source Data file.



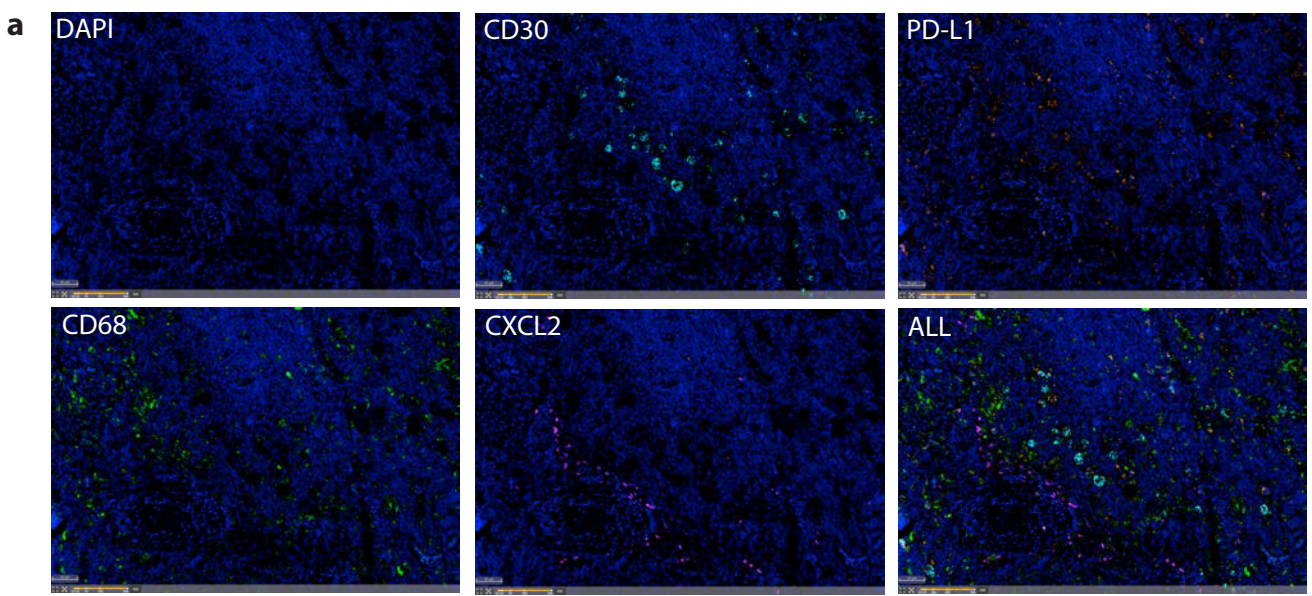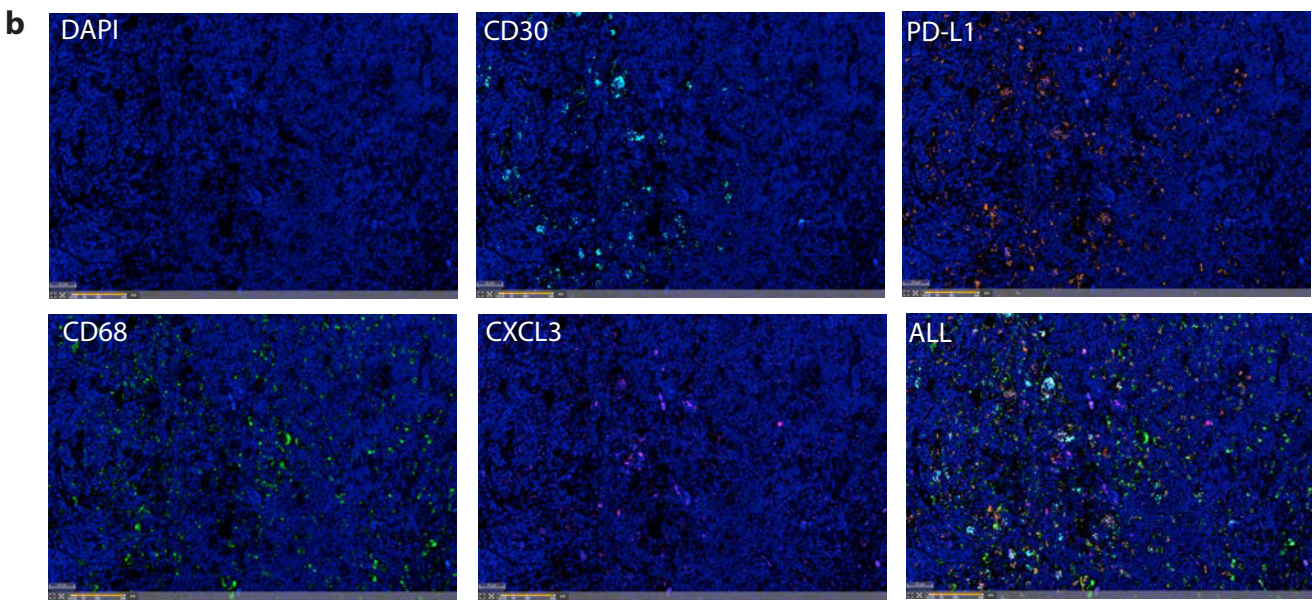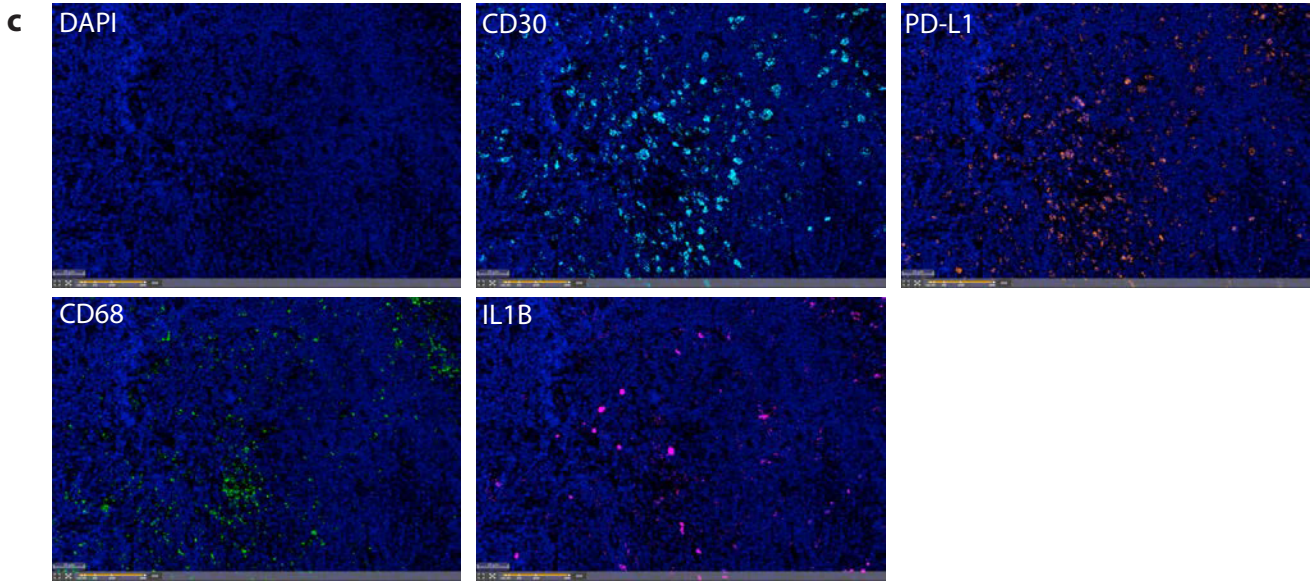

**Supplementary Figure 16. RNAscope imaging of Cluster 0 monocyte/macrophages in the intact cHL tumor immune microenvironment.** Single marker images of DAPI, *CD30*, *PD-L1*, *CD68*, *CXCL2* (a), *CXCL3* (b) and *IL1B* (c) staining by RNAscope multiplex immunofluorescence in a representative biopsy of newly diagnosed cHL. This experiment was performed in 4 ND cHL samples.

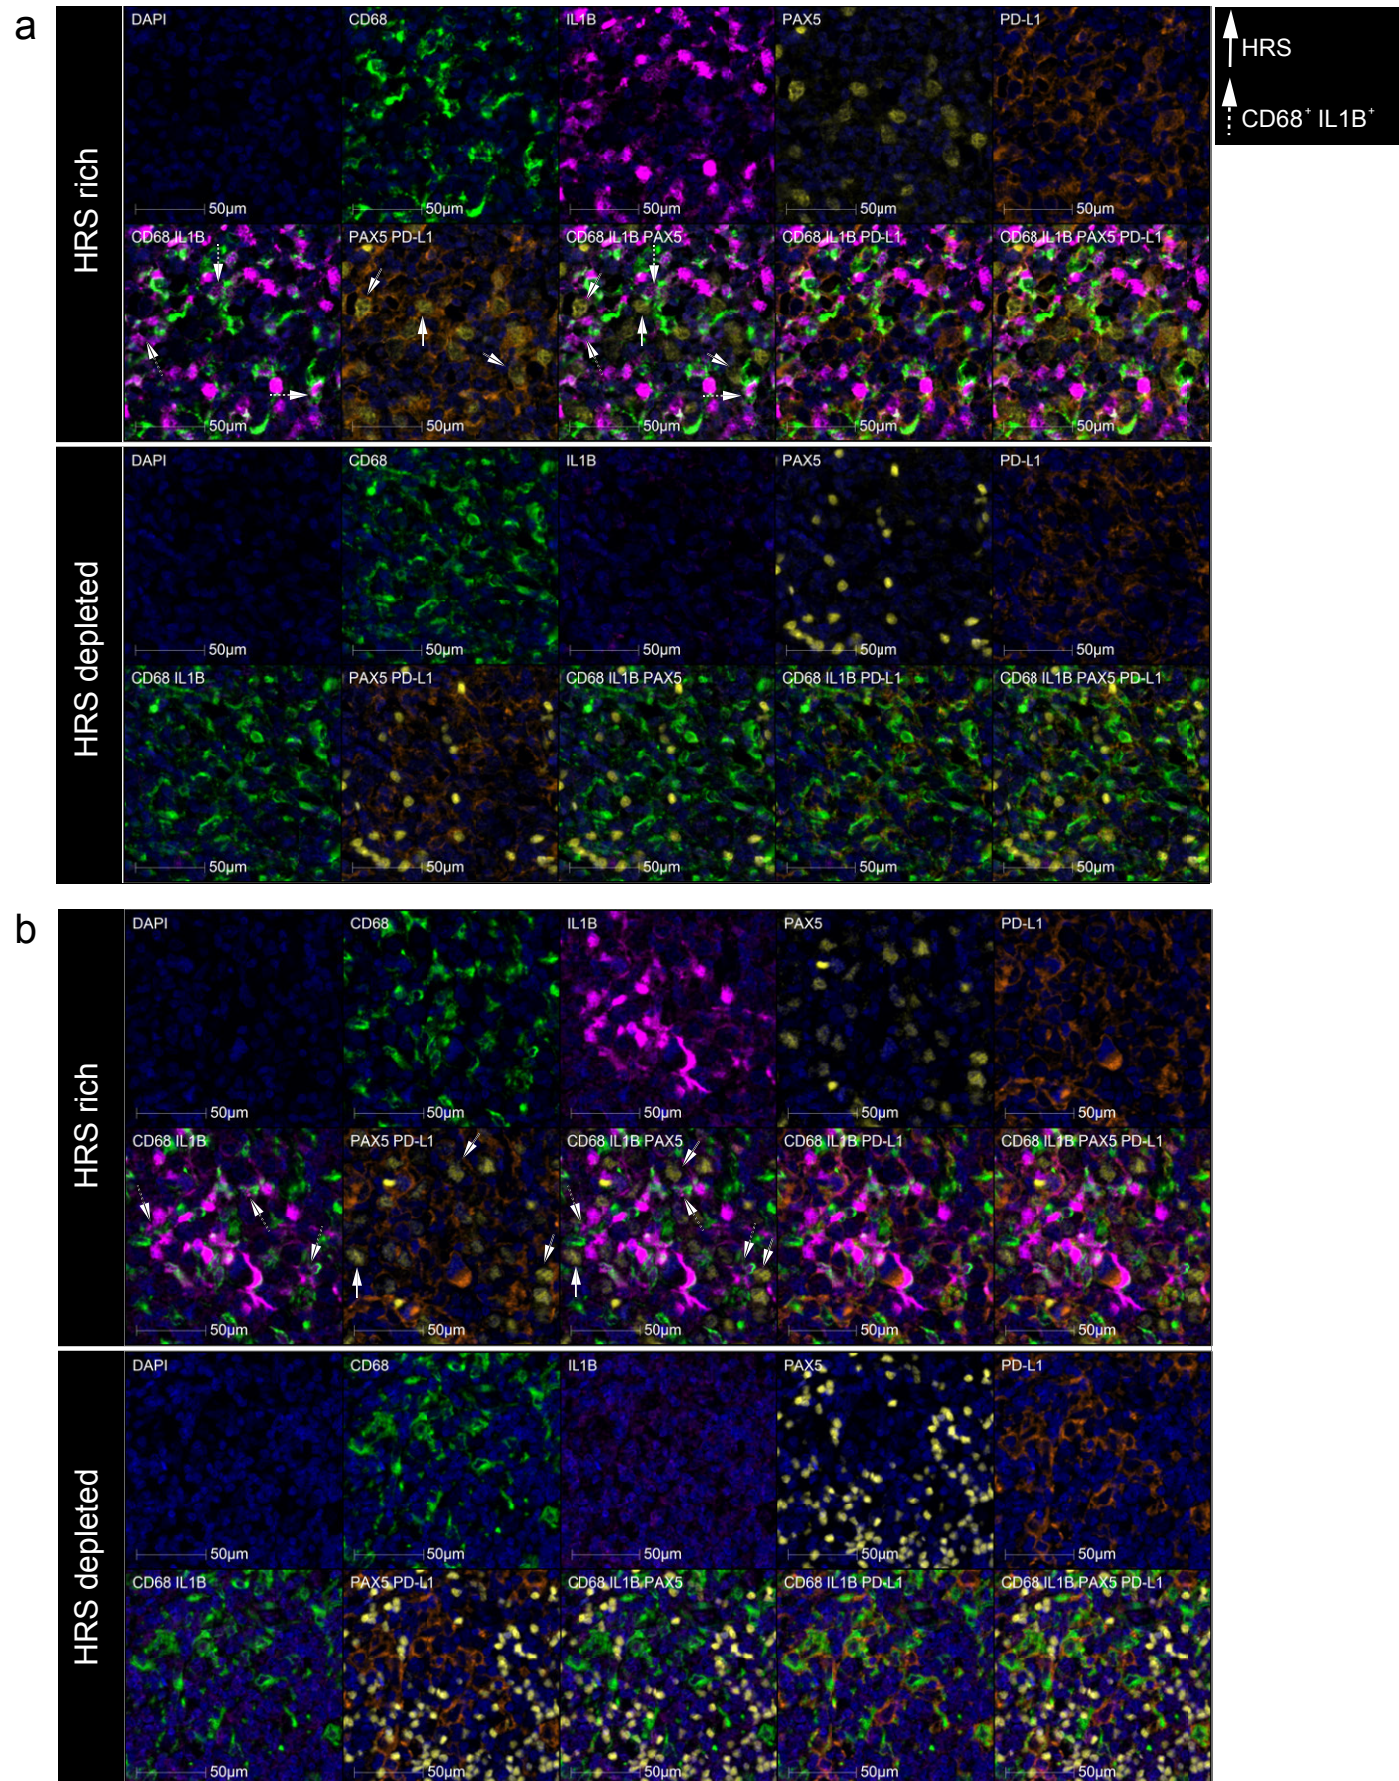

**Supplementary Figure 17. Multiplex immunofluorescence imaging of IL1 $\beta$ <sup>+</sup> monocyte/macrophages in the intact cHL tumor immune microenvironment.** Two representative newly diagnosed cHLs (**a** and **b**) with regions including abundant PAX5<sup>dim</sup> PD-L1<sup>+</sup> HRS cells (upper panel) and rare HRS cells (lower panel) are shown. Arrows identify PAX5<sup>dim</sup> PD-L1<sup>+</sup> HRS cells and IL1 $\beta$ <sup>+</sup> CD68<sup>+</sup> monocytes/macrophages, which are co-localized in HRS-rich regions (upper panel). Regions with rare PAX5<sup>dim</sup> PD-L1<sup>+</sup> HRS cells primarily include smaller PAX5<sup>bright</sup> normal B cells and IL1 $\beta$ <sup>+</sup> CD68<sup>+</sup> macrophages (bottom panel). CD68 green, IL1 $\beta$  magenta, PAX5 yellow and PD-L1 orange. This experiment was performed in 4 ND cHL samples.



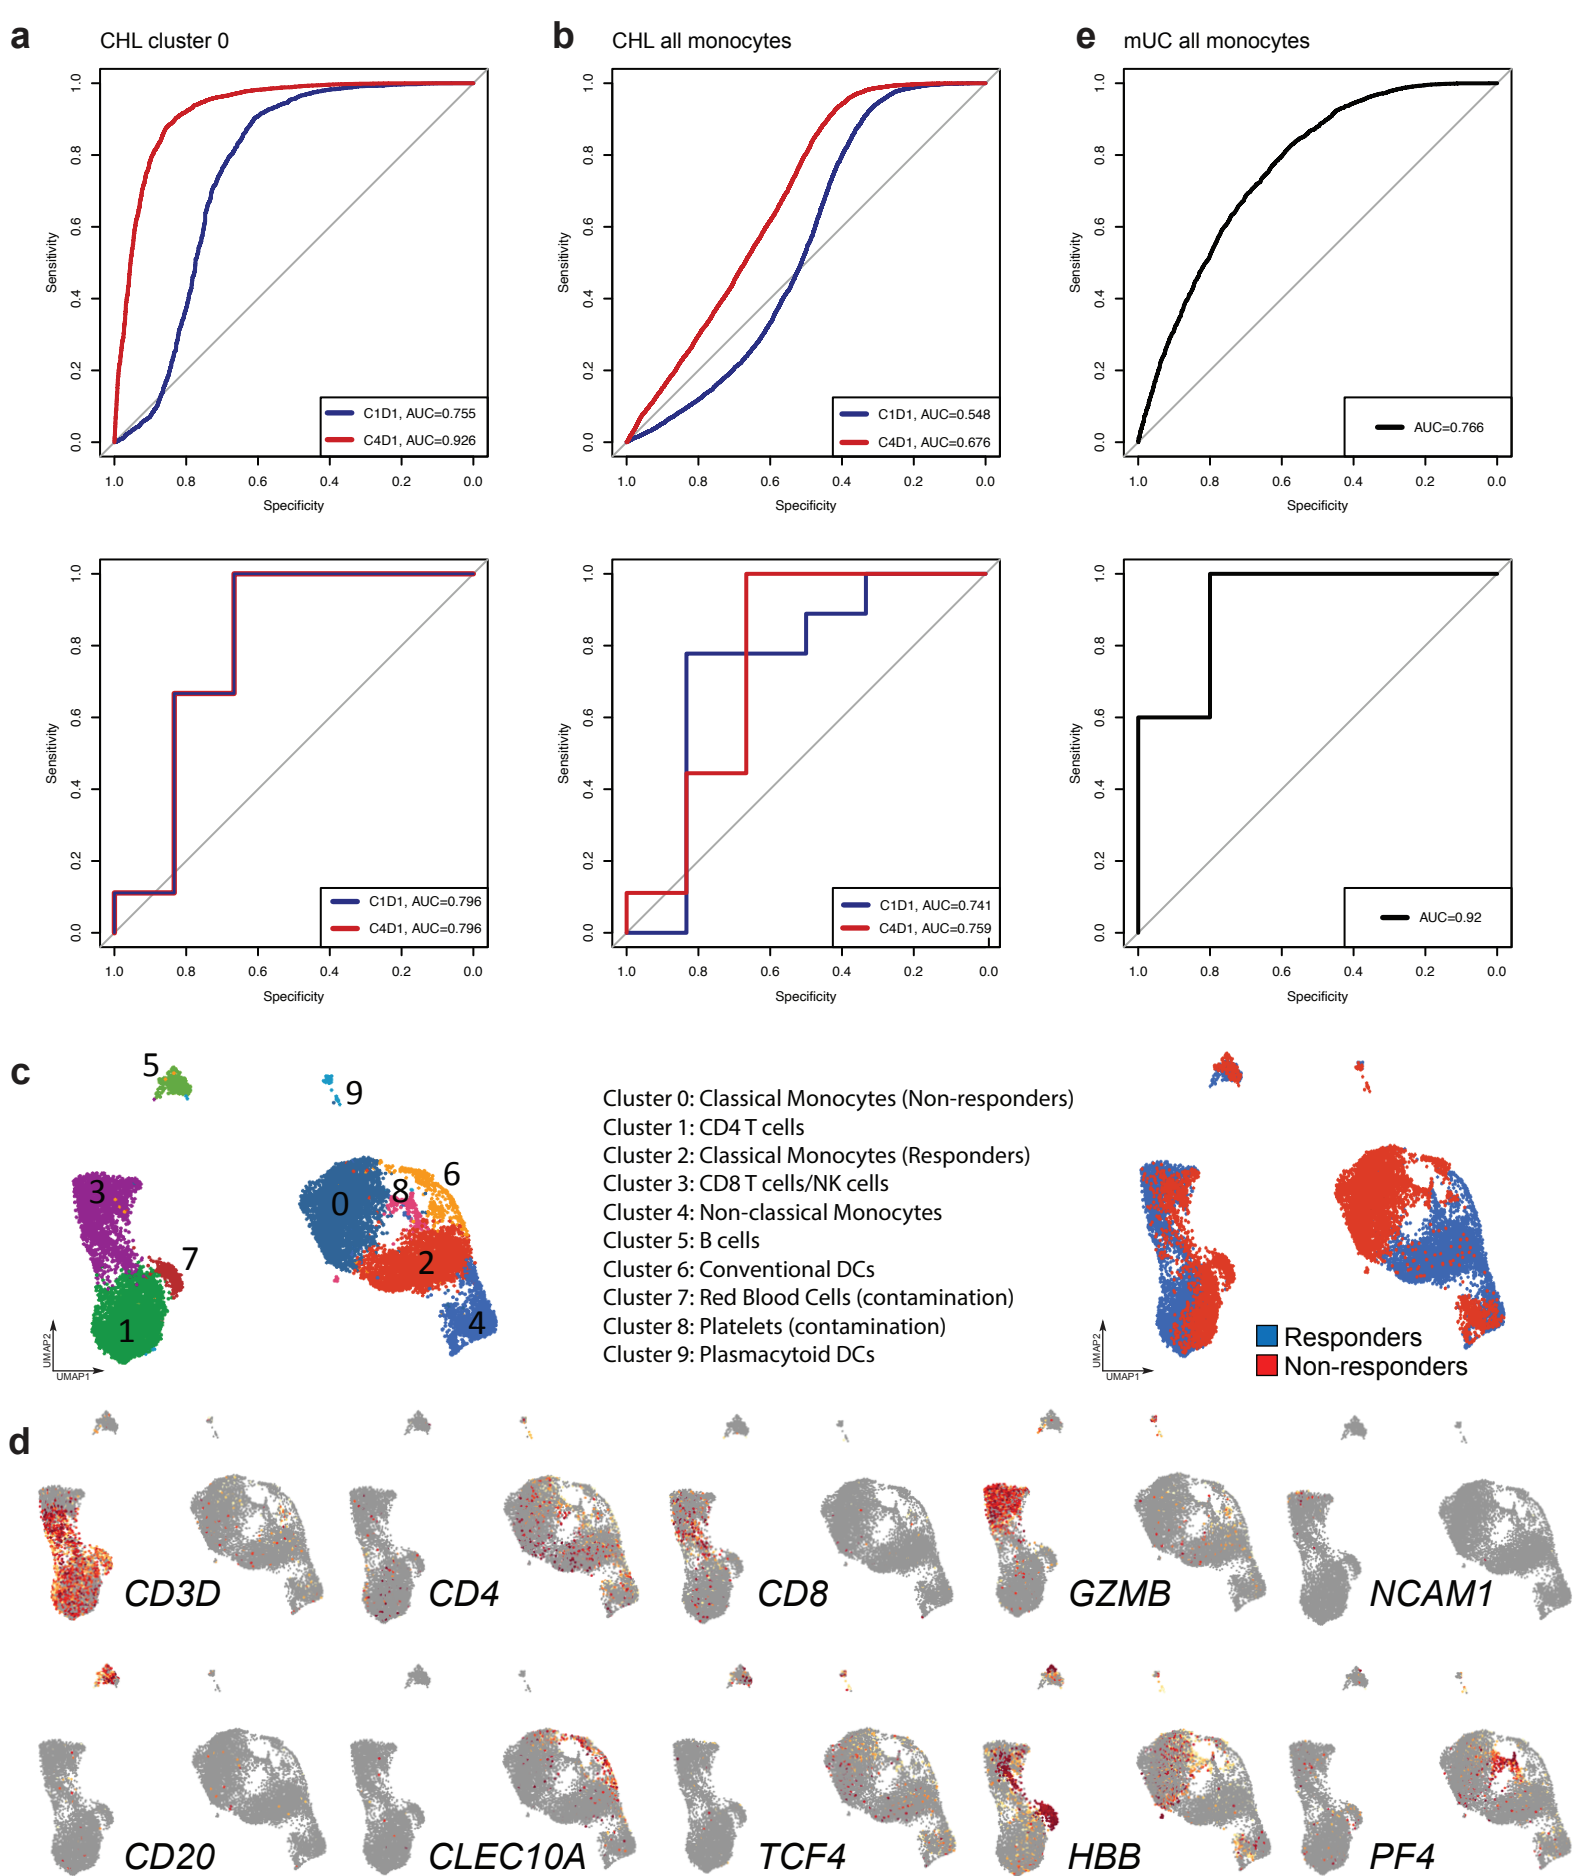

**Supplementary Figure 19. ROC curves showing the sensitivity and specificity of the Cluster 0 AUCell transcriptional signature in cHL Cluster 0 monocytes at the single-cell (a, upper panel) and patient levels (a, lower panel), CHL all monocytes at the single-cell (b, upper panel) and patient levels (b, lower panel), and metastatic urothelial carcinoma all monocytes at the single-cell (e, upper panel) and patient levels (e, lower panel), (ref Figure 6c-e, main manuscript). c-d Annotation of immune cell clusters in an independent scRNA-seq dataset of metastatic urothelial carcinoma treated with PD-L1 blockade (n=10) (Yuen et al. Nat Med 26, 693-698 (2020)). c Annotated Uniform Manifold Approximation and Projection (UMAP) of single-cell expression profiles (n=14,474 cells) (left panel); annotated clusters filtered by the response to PD-L1 blockade (right panel). d Feature plots of selected cell lineage and differentiation markers.**

|            |            |            |            |             |          |            |            |
|------------|------------|------------|------------|-------------|----------|------------|------------|
| CSF2       | TM4SF1     | AC024909.2 | METTL7B    | MAD1L1      | PHLDA2   | ZDHC6      | NGK7       |
| IL6        | TNFAIP8    | CRLF2      | SERPINB9   | BNIP3       | SNX10    | IQGAP1     | NAMPT      |
| CXCL5      | BATF3      | PRDM8      | NFKBIZ     | SLC43A3     | MMP9     | TMEM38B    | AD000671.2 |
| TFPI2      | SOD2       | ACSL5      | IL15RA     | THBS1       | IRAK2    | RUNX2      | PTAFR      |
| TNFSF15    | EREG       | RNF144B    | NFKBIA     | CARD16      | NFKB2    | FNDC3B     | MTSS1      |
| F3         | SERPINB2   | SEMA3C     | CLIC4      | MIR4435-2HG | PIK3CB   | PRMT2      | IARS       |
| ADAMTS6    | MMP14      | ITGB8      | DOCK4      | EHD1        | MYO10    | MMP24OS    | GTPBP4     |
| CXCL1      | HILPDA     | KMO        | PPME1      | FAM110A     | SERTAD2  | PTPRJ      | ATXN1      |
| CD274      | TNFRSF18   | NCR3LG1    | TNIP1      | CNDP2       | RAPH1    | SLC39A8    | RGCC       |
| MIR3142HG  | CXCL8      | TNFAIP3    | KLF6       | PIGA        | MATK     | DUSP4      | ZSWIM4     |
| CCL20      | AC023157.3 | AMPD3      | POLR3K     | PTRH1       | TPMT     | CETN2      | KMT2E-AS1  |
| LINC02426  | MIR3945HG  | KREMEN1    | C15orf48   | TNFRSF4     | SPCS2    | ANXA1      | CAHM       |
| PTGS2      | STAT4      | CTSL       | MPZL1      | TFB1M       | XBP1     | LONP1      | KDM5B      |
| AC026310.2 | AF213884.3 | N4BP3      | GALNT6     | NFKBIB      | MRAS     | AC016831.1 | IL3RA      |
| AC091808.1 | CCL3L1     | NCK2       | ST20       | PRKCD       | DOT1L    | AC123595.2 | GSTO1      |
| MIR155HG   | CDKN2A     | CSF1       | TRIB3      | MTF1        | SLCO4A1  | KLHL9      | PNP        |
| CCL3       | MME        | PPP3CC     | ANXA5      | RAB13       | TNIP2    | EIF1B      | FLT1       |
| TNFAIP6    | TFPI       | SOCS2      | LINC01943  | TNFSF8      | CD300E   | TMED5      | TSLP       |
| HMGA2      | DUSP8      | HLA-DQA2   | AC007032.1 | MGLL        | OAZ2     | DHRS9      |            |
| CXCL3      | SERPINB9P1 | AMZ1       | MAP1LC3A   | RAP1B       | HBA1     | ATP2B1     |            |
| CCL4       | MFSD2A     | ATP8B4     | NOTCH2NL   | TMEM106A    | SEC61A1  | LAMB3      |            |
| ZP3        | NBN        | FAM129A    | AC002456.1 | DENND4A     | CDK14    | HLA-DQA1   |            |
| IL1B       | GNG11      | AC017002.1 | CLU        | FCER1G      | ANKRD28  | CCDC18     |            |
| LINC00346  | CCL7       | ZDHC9      | EZH2       | CHST2       | MCTP1    | MCRIP1     |            |
| TRAF1      | AC004130.1 | AC006449.6 | C11orf96   | SNX9        | P2RX4    | FAM20A     |            |
| IL1A       | MIR210HG   | EDNRB      | SNX8       | C1orf122    | PLIN2    | PPID       |            |
| NT5E       | RRP1       | CASP1      | PDE4B      | IER3        | PIM3     | LHFPL2     |            |
| MSC        | SLC1A4     | MS4A7      | KCNN4      | RUBCNL      | IL1R1    | DUSP5      |            |
| NRP1       | SLC2A6     | AC015912.3 | UPB1       | AC103591.3  | HBB      | GABPB1     |            |
| MSANTD3    | IGFN1      | TIMP1      | METTL1     | NBPF26      | GPR137B  | PPP1R15B   |            |
| LINC00926  | AC025580.2 | MEI1       | TBC1D12    | CD40        | TMED9    | MYDGF      |            |
| MSC-AS1    | PGM3       | SLFN5      | ATP2B1-AS1 | PHLDA1      | BTG1     | EMP1       |            |
| ELOVL7     | PBX4       | SDC2       | NBPF9      | VPS37C      | FAM157C  | IRAK3      |            |
| TRIP10     | LINC00884  | CREB5      | TM4SF19    | TDP2        | TMEM208  | AC004540.1 |            |
| DPYSL3     | TTC28      | LRP12      | ARID5B     | TSPAN3      | KIFC3    | TBC1D8     |            |
| CXCL2      | SMG9       | CSTB       | SLC9A9     | RABGEF1     | TREM1    | TNFSF14    |            |
| C16orf45   | RHOBTB3    | HEY1       | DUSP6      | PPP1R15A    | KYNU     | PPARD      |            |
| AC003092.1 | BCAT1      | NBPF19     | BTG3       | ADA         | TRMT6    | NPC1       |            |
| MREG       | LDLRAD4    | ASPH       | GEM        | GPRC5A      | PDK1     | SLC16A3    |            |
| SOWAHC     | LINC01588  | NDST2      | PLAUR      | PLPP5       | TLR2     | PDE4DIP    |            |
| INHBA      | CCL4L2     | SLC11A2    | ST20-MTHFS | ACSL1       | WTAP     | FNIP2      |            |
| CDKN2B     | CD59       | SLC2A1     | ETS2       | OXSR1       | SURF4    | TPST1      |            |
| NRP2       | GGT5       | THAP2      | GBP1       | INF2        | SPRY2    | ZNF267     |            |
| SLAMF7     | DRAM1      | Z93930.2   | ASAP1      | ICAM1       | CCDC71L  | PSMA6      |            |
| AK4        | DTX2       | GADD45A    | TMEM158    | CSF2RA      | TRIO     | FOLR3      |            |
| STC1       | TOMM34     | LRBA       | GCH1       | SMS         | PID1     | MYL6       |            |
| SEPT10     | ANGPTL4    | MYC        | MMP19      | AQP9        | DMXL2    | HK2        |            |
| LINC01215  | ADORA2A    | AC025164.1 | ALG2       | OSBPL8      | UFM1     | NECAP2     |            |
| CCL2       | MAMLD1     | CRADD      | TXN        | ST3GAL1     | HIST3H2A | SBNO2      |            |
| SLC7A11    | MAML2      | NFKB1      | MCTP2      | CITED2      | ATP13A3  | ZNF655     |            |

**Supplementary Table 1. Differentially expressed genes in circulating Cluster 0 IL1B+ monocytes.** Differential expression analysis of response-related Cluster 0 transcripts in patients with relapsed/refractory (R/R) cHL who achieved a complete response (CR) or progressed on PD-1 blockade (PD). A two-sided permutation test, adjusted for multiple comparisons (adj p <0.1, fold change >1.5) was used to filter the differentially expressed Cluster 0 genes in patients who achieved a CR or progressed on therapy at C4D1.

A

| Gene Name | Accession No   | Target Region<br>[Base Pairs (bp)] | Company | Catalog #  | Channel | Probe Dilution | Fluor    | Fluor Dilution |
|-----------|----------------|------------------------------------|---------|------------|---------|----------------|----------|----------------|
| CD68      | NM_001040059.1 | 367 - 1149                         | ACD     | 560598     | 1       | 1:50           | Opal 520 | 1:1000         |
| CD274-C3  | NM_014143.3    | 124 - 1122                         | ACD     | 600868-C3  | 3       | 1:50           | Opal 620 | 1:1000         |
| CD30-C4   | NM_152942.2    | 835 - 2165                         | ACD     | 310838-C4  | 4       | 1:50           | Opal 690 | 1:1000         |
| IL1B-C2   | NM_000576      | 2 - 1319                           | ACD     | 310368-C2  | 2       | 1:50           | Opal 570 | 1:1000         |
| CXCL2-C2  | NM_002089.3    | 9 - 1164                           | ACD     | 425258-C2  | 2       | 1:50           | Opal 570 | 1:1000         |
| CXCL3-C2  | NM_002090.3    | 362 - 1059                         | ACD     | 1002158-C2 | 2       | 1:50           | Opal 570 | 1:1000         |

B

| Antigen | Clone                | Company        | Catalog # | Antibody Dilution | Diluent                                       | Antigen Retrieval, Time (min) |
|---------|----------------------|----------------|-----------|-------------------|-----------------------------------------------|-------------------------------|
| PAX 5   | Clone 24/Pax-5 (RUO) | BD Biosciences | 610862    | 1:100             | Akoya                                         | ER2, 30 mins                  |
| PD-L1   | 405.9A11             | not applicable | G.J.F.19  | 1:100             | Ab Discovery Diluent, Ventana Medical Systems | ER2, 30 mins                  |

C

| Antigen | Clone                | Company                   | Catalog # | Secondary, Time (min)                   | Antibody Dilution | Diluent | Fluor    | Fluor Dilution | Antigen Retrieval, Time (min) |
|---------|----------------------|---------------------------|-----------|-----------------------------------------|-------------------|---------|----------|----------------|-------------------------------|
| PAX 5   | Clone 24/Pax-5 (RUO) | BD Biosciences            | 610862    | Post Primary (15 min), Polymer (10 min) | 1:100             | Akoya   | Opal 570 | 1:100          | ER2, 10 mins                  |
| CTLA-4  | E2V1Z                | Cell Signaling Technology | 53560S    | Polymer (10 min)                        | 1:100             | CST     | Opal 520 | 1:100          | ER2, 20 mins                  |
| CD4     | 4B12                 | Agilent Dako              | M731001-2 | Post Primary (15 min), Polymer (10 min) | 1:200             | DV      | Opal 620 | 1:125          | ER2, 20 mins                  |
| Ki67    | MIB-1                | Agilent Dako              | GA62661-2 | Opal Polymer HRP (10 min)               | 1:100             | Akoya   | Opal 690 | 1:175          | ER1,20                        |
| FOXP3   | D2W8E                | Cell Signaling Technology | 98377S    | Polymer (10 min)                        | 1:100             | Akoya   | Opal 480 | 1:200          | ER2, 30 mins                  |

**Supplementary Table 2. List of probes that were used for RNAscope™ Multiplex Fluorescent Assay (a) and antibodies used for immunohistochemistry (b) and multiplex immunofluorescence (c).**
