# Supplementary material for: Cancer-specific innate and adaptive immune rewiring drives resistance to PD-1 blockade in classic Hodgkin lymphoma
Source: PubMed Central journal article supplement — Nat Commun. 2024 Dec 30;15:10740. doi: 10.1038/s41467-024-54512-7 (PMC11686379; doi:10.1038/s41467-024-54512-7), 2024-12-30
Supplement: 41467_2024_54512_MOESM2_ESM.pdf [file 41467_2024_54512_MOESM2_ESM.pdf]

## **Description of Additional Supplementary Files**

**Supplementary Data 1** - Characteristics of patient samples

**Supplementary Data 2** - Cell number per sample in CD3<sup>+</sup> CD8<sup>-</sup> (CD4<sup>+</sup> -enriched) clusters and CD3<sup>-</sup> clusters

**Supplementary Data 3** - T-cell receptor (TCR) CDR3 sequences obtained from scTCR-sequencing data

**Supplementary Data 4** - Clonotype expansion results from scTCR-sequencing data

**Supplementary Data 5** - Differential expression analysis for all individual CD3<sup>+</sup> CD8<sup>-</sup> clusters, CR vs PD at C1D1; Differential expression analysis for all individual CD3<sup>+</sup> CD8<sup>-</sup> clusters, CR vs PD at C4D1; Differential expression analysis for all individual CD3<sup>+</sup> CD8<sup>-</sup> clusters, CR C1D1 vs C4D1; Differential expression analysis for all individual CD3<sup>+</sup> CD8<sup>-</sup> clusters, PD C1D1 vs C4D1; Differential expression analysis for combined naïve/CM CD3<sup>+</sup> CD8<sup>-</sup> clusters, CR vs PD at C4D1

**Supplementary Data 6** - B-cell receptor CDR3 sequences obtained with TRUST4 from scRNA-sequencing data

**Supplementary Data 7** - Cell type label transfer to Mulder et al. compendium using the CD3<sup>-</sup> scRNA-sequencing data as a reference
